1 **Chromatin features define adaptive genomic regions in a**  
2 **fungal plant pathogen**

3

4 David E. Cook<sup>1,2\*</sup>, Martin Kramer<sup>2</sup>, Michael F. Seidl<sup>2,3</sup>, Bart PHJ Thomma<sup>2,4\*</sup>

5

6 <sup>1</sup>Department of Plant Pathology, Kansas State University, Manhattan KS, USA

7 <sup>2</sup>Laboratory of Phytopathology, Wageningen University & Research, Wageningen,  
8 The Netherlands

9 <sup>3</sup>Theoretical Biology & Bioinformatics Group, Department of Biology, Utrecht  
10 University, Utrecht, The Netherlands

11 <sup>4</sup>Cluster of Excellence on Plant Sciences (CEPLAS), University of Cologne, Botanical  
12 Institute, Cologne, Germany

13 \*Corresponding authors: David E. Cook, [decook@ksu.edu](mailto:decook@ksu.edu), Bart PHJ Thomma,  
14 [bart.thomma@wur.nl](mailto:bart.thomma@wur.nl)

15

16 **ABSTRACT**

17 Understanding the complex information stored in a genome remains challenging  
18 since multiple connected regulatory mechanisms act at various scales to determine  
19 function. Increased comprehension of genome function at scales beyond contiguous  
20 nucleotides will help understand genetic diseases, the emergence of pathogenesis,  
21 and more broadly the genomics of adaptation. Here we report the analysis of DNA  
22 methylation, histone modification, and DNA accessibility in the plant pathogenic  
23 vascular wilt fungus *Verticillium dahliae*. Functional analysis details that DNA  
24 methylation is restricted to repetitive elements, such as transposable element DNA,  
25 but interestingly only some repetitive DNA is methylated. This incomplete DNA  
26 methylation is associated with repetitive DNA residing in specific compartments of  
27 the genome that were previously defined as Lineage-Specific (LS) regions. These  
28 regions are hypervariable between *V. dahliae* isolates and contain genes that  
29 support host colonization and adaptive traits. LS regions are associated with H3 Lys-  
30 27 methylated histones (H3K27me3), and repetitive DNA within LS regions are  
31 more transcriptionally active and have increased DNA accessibility, representing a  
32 hybrid chromatin state when compared to repetitive regions within the core  
33 genome. We used machine learning algorithms trained on epigenetic and DNA  
34 accessibility data to predict LS regions with high recall, identifying approximately  
35 twice as much LS DNA in the *V. dahliae* genome as previously recognized.  
36 Collectively, these results characterize LS regions in an intermediate chromatin  
37 state and provide evidence that links chromatin features and genome architecture  
38 to adaptive regions within the genome.

## 39 INTRODUCTION

40 Genomes are not randomly organized and comprise complex information beyond  
41 their linear nucleic acid sequence <sup>1</sup>. While scientific understanding of genome  
42 biology continues to grow, significant efforts in the past decade have focused on  
43 sequencing new species and additional genotypes of those species <sup>2</sup>. However, there  
44 is a great need to decode the complex information stored in these genomes, to  
45 understand genomic responses over various time scales, and ultimately to more  
46 fully understand how genotypes lead to phenotypes. With the growing number of  
47 high-quality, highly contiguous genome assemblies it is possible to analyze genome  
48 organization into chromosomes at high resolution <sup>3</sup>. Present day genome  
49 organization reflects evolutionary solutions to the challenges of information  
50 processing and adaptation; a genome must faithfully pass vast amounts of  
51 information across cell-cycles and reproduction, packaged into limited physical  
52 space, while achieving correct access to the information in response to  
53 developmental, environmental or chemical signals. In addition, there needs to be  
54 appreciable stochastic genetic variation to ensure that phenotypic variation is  
55 present for unknown future events. Organisms undergoing mainly asexual  
56 reproduction face an additional evolutionary constraint as they must generate this  
57 genetic variation in the absence of meiotic recombination <sup>4</sup>. Many economically  
58 important fungal plant pathogens are either asexual or undergo more frequent  
59 asexual reproduction compared to sexual reproduction <sup>5</sup>. Interestingly, fungal  
60 pathogens are subject to additional evolutionary pressure from their hosts, as host-  
61 pathogen interactions create dynamical systems with shifting, yet near-constant  
62 selective pressure on the two genomes <sup>6</sup>. These attributes make plant-fungal  
63 interactions a particularly interesting system to study aspects of genome evolution  
64 and genome organization <sup>7,8</sup>.

65

66 Plant invading microbes use effectors to suppress, avoid or mitigate the plant  
67 immune system <sup>9,10</sup>. Plants in-turn use a variety of plasma-membrane bound and  
68 cytoplasmic receptors to recognize invasion, through recognition of the effector or

69 its biochemical activity, creating a strong selective pressure on the microbe to  
70 modify the effector or its function to alleviate recognition <sup>11,12</sup>. The plant pathogenic  
71 fungus *Verticillium dahliae* causes vascular wilt diseases on hundreds of plant hosts.  
72 *V. dahliae* is presumed asexual and generates genomic diversity in the absence of  
73 sexual recombination through large-scale chromosome re-arrangements and  
74 segmental duplications <sup>13-16</sup>. The regions undergoing such duplications and re-  
75 arrangements are hypervariable between *V. dahliae* isolates, and consequently have  
76 been referred to as Lineage-Specific (LS) regions. These LS regions are enriched for  
77 *in planta* expressed genes and harbor many effector genes contributing to host  
78 infection <sup>14,17,18</sup>. Similar non-random genomic arrangement of effectors have been  
79 reported across diverse plant pathogenic fungal and oomycete genomes <sup>14,19-25</sup>. One  
80 summary of these observations is referred to as the two-speed genome, in which  
81 repeat-rich regions harboring effectors evolve more rapidly than genes outside  
82 these regions <sup>26</sup>.

83

84 Previous research in various plant-associated fungi has established a link between  
85 posttranslational histone modifications and transcriptional regulation of adaptive  
86 trait genes. These genes include effectors that facilitate host infection, and  
87 secondary metabolite (SM) clusters that code for genes that produce chemicals  
88 important for niche fitness <sup>27</sup>. By removing or reducing enzymes responsible for  
89 particular repressive histone modifications, such as di- and trimethylation of Lys9  
90 and Lys27 residues of histone H3 (H3K9me2/3 and H3K27me2/3), a  
91 disproportionately high number of effector and SM cluster genes are derepressed,  
92 although a direct role of these marks in transcriptional control was not  
93 demonstrated <sup>28-30</sup>. However, evidence from the fungus *Epichloe festucae* that forms  
94 a mutualistic interaction with its grass host *Lolium perenne* indicates that direct  
95 transcriptional regulation through histone modification dynamics is possible <sup>31</sup>.  
96 Although there are clear indications that the epigenome (i.e. heritable chemical  
97 modifications to DNA and histones not affecting the genetic sequence) plays a role in

98 adaptive gene regulation, additional evidence is needed to fully understand this  
99 phenomenon.  
100  
101 Epigenetic modifications influence chromatin structure, defined as the DNA-RNA-  
102 protein interactions giving DNA physical structure in the nucleus <sup>32,33</sup>. This physical  
103 structure affects how DNA is organized in the nucleus and DNA accessibility.  
104 Methylation of H3K9 and H3K27 are hallmarks of heterochromatin; DNA that is  
105 tightly compacted in the nucleus <sup>34-37</sup>. H3K9 methylation is not only associated with  
106 controlling constitutive heterochromatin, but also tightly linked with DNA cytosine  
107 methylation (mC), which serves as an epigenetic mark contributing to  
108 transcriptional silencing <sup>38</sup>. A single DNA methyltransferase gene, termed *Dim2*,  
109 performs cytosine DNA methylation in the saprophytic fungus *Neurospora crassa* <sup>39</sup>.  
110 Histone methylation at H3K9 directs DNA methylation by DIM2 through another  
111 protein, termed heterochromatin protein 1 (HP1), which physically associates with  
112 both DIM2 and H3K9me3 <sup>40,41</sup>. Some fungi possess a unique pathway to limit the  
113 expansion of repetitive DNA such as transposable elements through repeat-induced  
114 point mutation (RIP), a mechanism that specifically mutates repetitive DNA in the  
115 genome during meiosis and induces heterochromatin formation <sup>42,43</sup>. The mutations  
116 occur at methylated cytosines resulting in conversion to thymines (C to T mutation)  
117 <sup>44</sup>. H3K27 methylation is associated with heterochromatin that is thought to be  
118 more flexible in its chromatin status and exist as bivalent chromatin that may be  
119 either transcriptionally repressed or active depending on developmental stage or  
120 environmental cues <sup>45-48</sup>. The deposition of H3K27me3 is controlled by a histone  
121 methyltransferase that is a member of a complex of proteins termed Polycomb  
122 Repressive Complex 2 (PRC2), with orthologs of the core machinery present across  
123 many eukaryotes <sup>36,49</sup>.  
124  
125 In addition to heterochromatin playing a role in transcriptional regulation in  
126 filamentous fungi, epigenetic marks contributing to chromatin may influence  
127 genome evolution <sup>50</sup>. In *N. crassa*, DNA is physically arranged in the nucleus

128 corresponding to heterochromatic and euchromatic domains, with strong inter- and  
129 intra-heterochromatin DNA-DNA interactions reported<sup>51,52</sup>. Recent experimental  
130 evidence using *Zymoseptoria tritici*, a fungal pathogen of wheat, suggests that  
131 H3K27me3 promotes genomic instability<sup>53</sup>. In the oomycete plant pathogens  
132 *Phytophthora infestans* and *Phytophthora sojae* a clear association exists between  
133 gene-sparse and transposon-rich regions of the genome and the occurrence of  
134 adenine N6-methylation (6mA)<sup>54</sup>. Collectively these examples point towards an  
135 unexplained connection between the epigenome, genome architecture, and adaptive  
136 evolution. To examine the hypothesis that epigenetic modifications influence the  
137 adaptive LS regions of *V. dahliae*, we performed a series of genetic, genomic, and  
138 machine learning analyses to characterize these regions in greater detail.

139

## 140 **RESULTS**

### 141 **DNA cytosine methylation occurs at transposable elements**

142 To understand the role of DNA methylation in *V. dahliae*, whole-genome bisulfite  
143 sequencing, in which unmethylated cytosine bases are converted to uracil while  
144 methylated cytosines remain unchanged<sup>55,56</sup>, was performed in the wild-type and a  
145 heterochromatin protein 1 deletion mutant ( $\Delta hp1$ ). The overall level of DNA  
146 methylation in *V. dahliae* is low, with an average weighted methylation percentage  
147 (calculated as the number of reads supporting methylation over the number of  
148 cytosines sequenced) at CG dinucleotides of 0.4% (Table 1). The fractional CG  
149 methylation level (calculated as the number of cytosine positions with a methylated  
150 read over all cytosine positions) is higher, averaged to 9.7% over 10 kb windows.  
151 Weighted and fractional cytosine methylation (mC) levels are statistically  
152 significantly higher in the WT compared to the  $\Delta hp1$  mutant for all cytosine contexts  
153 (Table 1, Supplemental Fig. S1A and B). This result is consistent with the  
154 requirement of HP1 for DNA methylation in *N. crassa*<sup>40</sup>. To understand DNA  
155 methylation in the context of the functional genome, DNA methylation was analyzed  
156 over genes, promoters, and transposable elements (TE). Despite statistically  
157 significant differences between WT and  $\Delta hp1$  for gene and promoter methylation,

158 the bisulfite sequencing data shows virtually no DNA methylation at these two  
159 features (Fig. 1A). We attribute the difference to a marginal set of elements having a  
160 real difference between the genotypes, but the biological significance is likely  
161 negligible (Fig. 1A). In contrast, there is a much higher degree of methylation, and a  
162 notable difference between wild-type and  $\Delta hp1$  methylation levels at TEs (Fig. 1A,  
163 bottom panel), with the average CG methylation level being five times higher in the  
164 wild-type strain.

165

166 Table 1. Summary of DNA methylation in *Verticillium dahliae* wild-type (WT) and  
167 heterochromatin protein 1 deletion mutant ( $\Delta hp1$ ) as measured by whole genome  
168 bisulfite sequencing calculated over 10 kb non-overlapping windows.

| Genotype     | Avg. Weighted mCG | Avg. Weighted mCHG | Avg. Weighted mCHH | Avg. Fraction mCG | Avg. Fraction mCHG | Avg. Fraction mCHH |
|--------------|-------------------|--------------------|--------------------|-------------------|--------------------|--------------------|
| WT           | 0.0040            | 0.0037             | 0.0034             | 0.097             | 0.097              | 0.088              |
| $\Delta hp1$ | 0.0030            | 0.0030             | 0.0032             | 0.082             | 0.083              | 0.079              |

169 Avg. Weighted, The average of total methylated cytosines in a given context divided  
170 by total cytosines in that context in a 10 kb windows; Avg. Fraction, The total  
171 cytosines positions with a read supporting methylation divided by total cytosines in  
172 a specific context in a 10 kb window; mCG, methylated cytosine residing next to a  
173 guanine; mCHG, methylated cytosine residing next to any base that is not a guanine  
174 next to a guanine; mCHH, methylated cytosine residing next to any two bases that  
175 are not a guanines.

176

177 To further analyze DNA methylation levels and confirm that the low DNA  
178 methylation levels in the wild-type strain are indeed different than those in  $\Delta hp1$ , CG  
179 DNA methylation levels were plotted in 10 kb windows across individual  
180 chromosomes. These plots clearly show that DNA methylation is not continuously  
181 present across the *V. dahliae* genome, and DNA methylation is significantly different  
182 between wild-type and  $\Delta hp1$  (Fig. 1B, C). Furthermore, regions in the genome with  
183 higher densities of TEs and lower gene numbers have higher levels of DNA  
184 methylation, consistent with the global DNA methylation summary (Fig. 1B and C).  
185 Interestingly, these results show that while DNA methylation is only present at TEs,  
186 not all TEs are methylated, a phenomenon that was previously described as ‘non-  
187 exhaustive’ DNA methylation<sup>57</sup>. To further understand this phenomenon, we sought

188 to identify discriminating genomic features that could account for some TEs not  
 189 being methylated. The whole-chromosome methylation data suggested a lack of  
 190 DNA methylation at previously identified LS regions (Fig. 1C, grey windows). These  
 191 LS regions were previously detailed for *V. dahliae*, and are characterized as regions  
 192 that are highly variable between isolates of the species, are enriched for actively  
 193 transcribed TEs, and contain an increased proportion of genes involved in host  
 194 virulence<sup>13-15</sup>. Thus, we tested if DNA sequences at LS regions are less frequently  
 195 methylated by comparing weighted mCG levels in 10 kb bins containing at least one  
 196 TE for core versus LS regions. This analysis showed significantly more DNA  
 197 methylation for core bins, which cannot be accounted for by a simple difference in  
 198 the number of TEs in the core and LS regions analyzed (Fig. 1D and E). Higher CG  
 199 methylation levels also hold true when analyzed at the level of individual TE  
 200 elements (Fig. 1F, numbers of elements in Supplemental Table S1). Collectively,  
 201 these analyses demonstrate that DNA methylation occurs almost exclusively at TEs  
 202 and, importantly, that not all TEs are methylated. This observation can in part be  
 203 explained by mCG differences for TEs in the core versus LS regions.  
 204

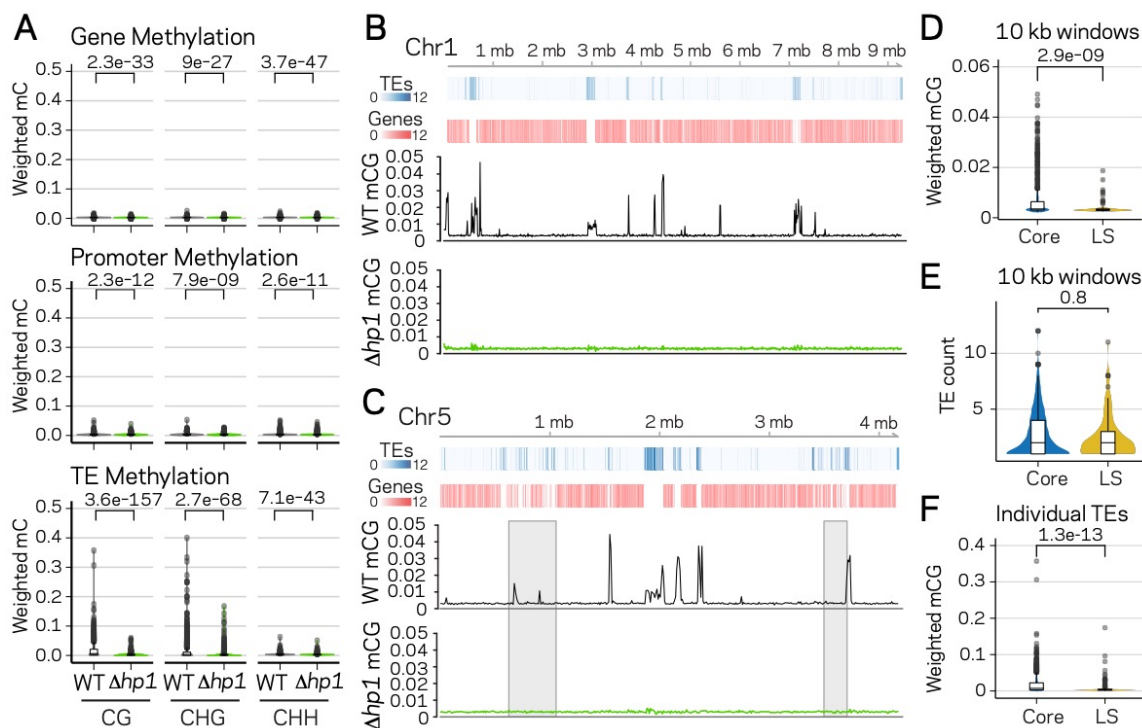



Figure 1. DNA methylation is only present at transposable elements, but not at those present in LS regions. (A) Violin plot of the distribution of DNA methylation levels quantified as weighted methylation over Genes, Promoters and TEs. Cytosine methylation was analyzed in the CG, CHG and CHH sequence context. Methylation was measured in the wild-type (WT) and heterochromatin protein 1 knockout strain ( $\Delta h p 1$ ). (B, C) Whole chromosome plots showing TE and Gene counts (blue and red heatmaps) and wild-type (black lines) and  $\Delta h p 1$  (green line) CG methylation as measured with bisulfite sequencing. Data is computed in 10 kilobase non-overlapping windows. (C) Two previously defined LS regions (Faino *et al.* 2016) are highlighted by grey windows. (D) Violin plot of weighted cytosine methylation in 10 kb windows broken into core versus LS location (E) Same as D but plots are for the counts of TEs per 10 kb window. (F) Same as in D but methylation levels were computed at individual TE elements. Statistical differences for indicated comparisons were carried out using non-parametric Mann-Whitney test with associated p-values shown.

205

## 206 **Transposable element classes have distinct profiles for genomic and** 207 **epigenomic features**

208 To understand the functional status of the various TEs in the genome, DNA-histone  
209 modification location data were collected using chromatin immunoprecipitation  
210 followed by sequencing (ChIP-seq) against H3K9me3 and H3K27me3, which allows  
211 for the identification of DNA interacting with these modified histones.  
212 Characteristics of TE sequence, such as GC percentage, composite RIP index (CRI),  
213 and TE age, estimated as the Jukes-Cantor distance to the consensus sequence of the  
214 specific TE family, were calculated (see methods). To further classify genomic  
215 regions as eu- or heterochromatic, we performed an assay for transposase  
216 accessible chromatin and sequencing (ATAC-seq)<sup>58</sup>. This method uses a TN5  
217 transposase to restrict physically accessible DNA in the nucleus and tags the DNA  
218 ends with oligonucleotides for downstream sequencing. Transcriptional activity was  
219 assayed using RNA-sequencing. To analyze all of these TE characteristics (variables)  
220 at once, dimensional reduction with principle component analysis (PCA) was  
221 employed, which facilitates data interpretation on two-dimensions to identify  
222 important variables and their relationships within large datasets. The individual TEs  
223 were grouped into four broad classes (Type I DNA elements and Type II LTR, LINEs,  
224 and Unspecified elements) and analyzed for each measured variable. The first  
225 dimension of PCA shows the largest separation of the data points and variables, and  
226 largely separates the data based on euchromatin versus heterochromatin features

227 (Fig. 2A, PC1). This is seen by the variables ATAC-seq, %GC, RNA-sequencing,  
228 H3K9me3 ChIP, CRI and DNA methylation (mCG) being furthest separated along the  
229 x-axis (Fig. 2A). Open chromatin features such as higher ATAC-seq, %GC, and  
230 transcriptional activity are positive on the x-axis, with small angles between the  
231 vectors, indicating correlation among those variables. Conversely, features  
232 associated with heterochromatin, such as H3K9me3 association, DNA methylation  
233 and indication of RIP (CRI) are all negative on the x-axis, and the position of their  
234 vectors indicates correlation among these variables, and negative correlation to the  
235 euchromatin features (Fig. 2A). The second axis discriminates elements based on  
236 their H3K27me3 profile and sequence characteristics such as Jukes Cantor (TE age),  
237 Identity and Length (Fig. 2A). For the individual element classification, there is a  
238 stronger association for the LTR and Unspecified elements with the  
239 heterochromatin features (Fig. 2A, grey and red ellipse extending along negative x-  
240 axis). Collectively, this multivariate description of TEs identifies those that are more  
241 transcribed and open as having lower association with H3K9me3, mCG, and RIP  
242 mutation. There are statistically significant differences between the TE types for  
243 each of these variables (Supplemental Table S2), and the LTR elements have the  
244 highest levels of H3K9me3 and mCG, along with the highest CRI values and lowest  
245 %GC, consistent with the mechanistic link between the four variables (Fig. 2B).  
246 Interestingly, a bimodal distribution occurs for %GC and CRI within the LTR and  
247 Unspecified elements, indicating that some of the LTR elements have undergone RIP  
248 and are heterochromatic, while other elements have not been subject to this  
249 mechanism (Fig. 2B). This delineation occurs for the Unspecified and LTR elements  
250 with a %GC sequence content less than approximately 40%, which have positive CRI  
251 values and high H3K9me3 signal (Fig. 2C). A similar distinction is seen with ATAC-  
252 seq data that show a clear break around 40% GC content, and elements below this  
253 have lower ATAC-seq signal and higher H3K9me3 signal (Fig. 2D). These trends are  
254 not observed for the LINE and DNA elements (Supplemental Fig. S2). These results  
255 suggest that LTR and Unspecified TE elements exist in two distinct chromatin states  
256 in the genome.

257

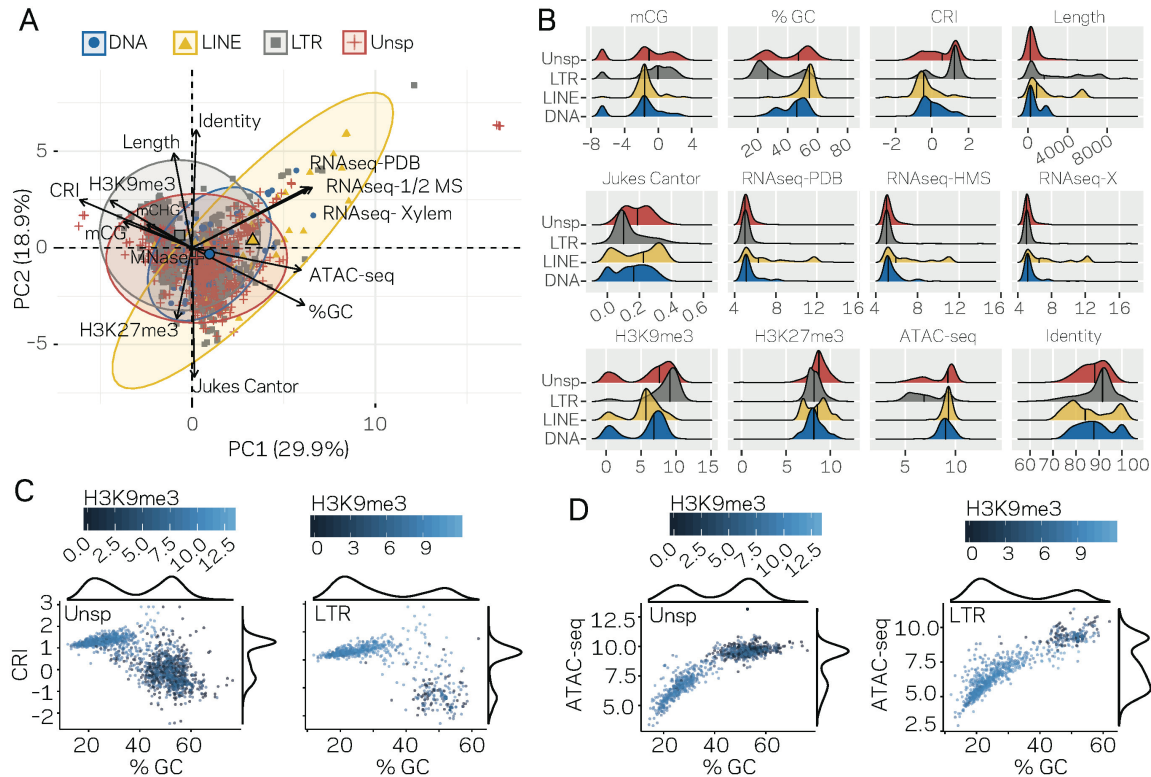

**Figure 2. Individual TE families have distinct epigenetic and physical compaction profiles. (A)** Principle component analysis for 14 variables measured for each individual TE. Each vector represents one variable, with the length signifying the importance of the variable in the dimension. The relationship between variables can be determined by the angle connecting two vectors. For angles  $<90^\circ$ , the two variables are correlated, while those  $>90^\circ$  are negatively correlated. Each individual element is shown and highlighted by color and symbol as indicated by the key. Colored ellipses show the confidence interval for the four families along with a single large symbol to show the mean position for the four families. mCG, weighted CG DNA methylation; mCHG, weighted CHG DNA methylation; CRI, Composite RIP index; %GC, percent GC sequence content; Identity, Nucleotide identity as percent identity to the consensus TE sequence of a family; Length, element length; Jukes Cantor, Jukes Cantor corrected distance as proxy of TE age; RNAseq, RNA-sequencing reads from (PDB), half strength MS (HMS) or tomato xylem sap (Xylem) grown fungus expressed as variance stabilizing transformed  $\log_2$  values (see methods for details); H3K9me3,  $\log_2$  (TPM+1) values of mapped reads from H3K9me3 ChIP-seq; H3K27me3,  $\log_2$  (TPM+1) values of mapped reads from H3K27me3 ChIP-seq; ATAC-seq,  $\log_2$  (TPM+1) values for mapped reads from Assay for transposase accessible chromatin. **(B)** Ridge plots showing the distribution of the individual TE families per variable. The median value is shown as a solid black line in each ridge. Variables same as in A except for mCG,  $\log_2$ (weighted cytosine DNA methylation + 0.01). **(C)** Scatter plot for %GC versus CRI values for individual TE elements shown as points. The two plots are for TEs characterized as Unspecified (Unsp) or LTR, labeled in the upper left corner. Each point is colored according to  $\log_2$  (TPM+1) values from H3K9me3 ChIP-seq, scale shown above each plot. A density plot is shown for both variables on the opposite side from the labeled axis. **(D)** Same as in C, but the y-axis is now showing the  $\log_2$  (TPM+1) values from ATAC-seq.

259 **Transposable element location significantly influences the epigenetic and DNA**  
 260 **accessibility profile**

261 To further dissect the relationship between epigenetic modifications, chromatin  
 262 status and genomic location, pair-wise comparisons were made for all TEs in core  
 263 versus LS regions. All measured variables, except TE length, are significantly  
 264 different for TEs in the core versus LS regions (Supplemental Fig. S3). Further  
 265 division of the TEs indicated that the LTR and Unspecified elements showed the  
 266 greatest differences for core versus LS measurements (Fig. 3A), demonstrating that  
 267 the major driver of core versus LS differences are driven by the LTR and Unspecified  
 268 elements. The bimodal distribution for %GC, CRI, H3K9me3, and ATAC-seq can be  
 269 accounted for in part by core versus LS separation (Fig. 3B, red versus grey).  
 270 Collectively, the status of the LS TE elements can be characterized as devoid of DNA

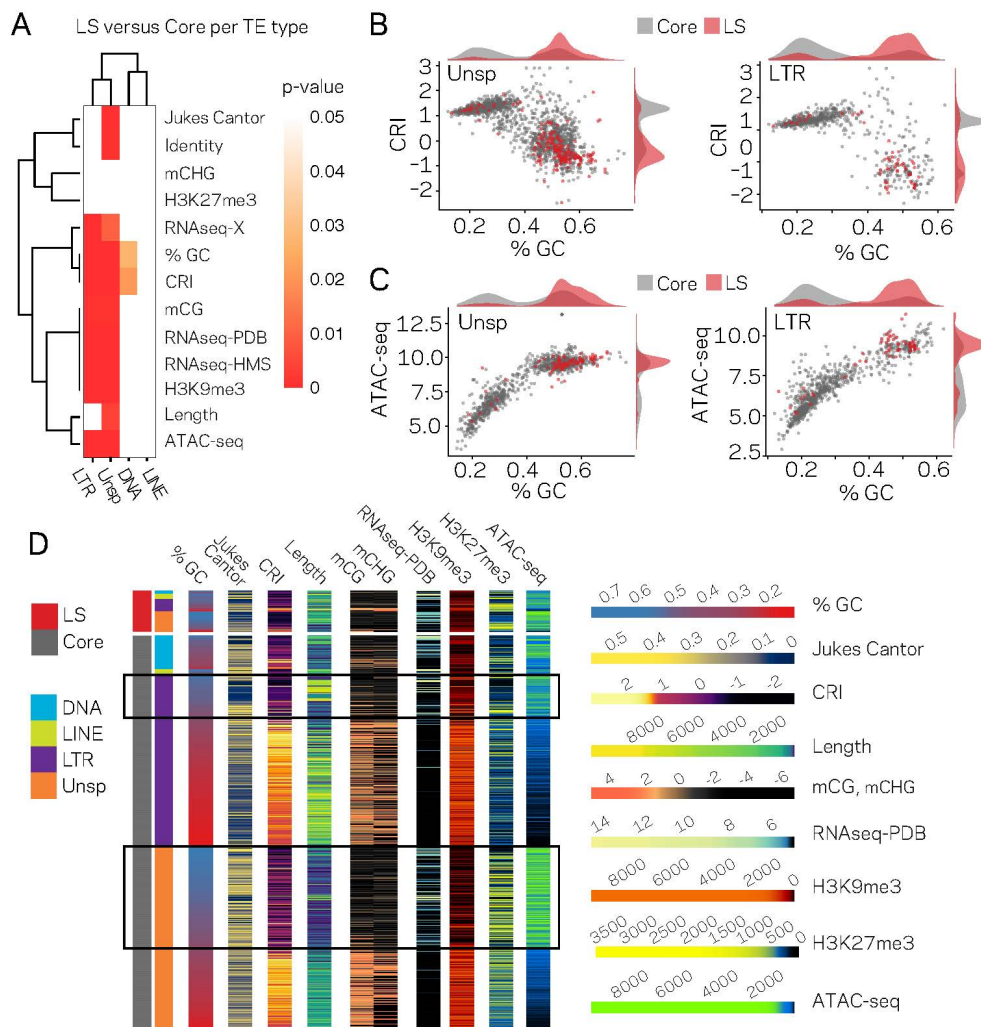

Figure 3. The LTR and Unspecified elements have significantly different chromatin profiles based on core versus LS location. (A) Heatmap comparing core versus LS values within the four TE classifications for the variable listed to the right. Plot colored based on p-values from Wilcoxon rank sum test. P-values  $\geq 0.05$  are colored white going to red for p-value  $\cong 0$ . (B) Scatter and density plots similar to those shown in Figure 2c except the individual TE points are colored by core (grey) versus LS (red) location. The density plots are also constructed based on the two groupings (C) Similar to B, with the y-axis now showing the  $\log_2$  (TPM+1) values from ATAC-seq (D) Multiple grouped heatmaps for ten variables collected for each TE. Each row represents a single element and the same ordering is used across all plots. The LS elements are grouped at the top, indicated by the red bar at the top left, and the core elements are grouped below, indicated by the grey bar at the left. Elements are further grouped by the four classifications indicated by the color code shown to the left. Within each element group, the elements are ordered by descending GC content. The scale for each heatmap is shown at the right. % GC, percent GC sequence content; Jukes Cantor, corrected distance as proxy of TE age; CRI, Composite RIP index; Length, element length; mCG and mCHG,  $\log_2$ (weighted cytosine DNA methylation+0.01) for CG and CHG respectively; RNAseq-PDB, variance stabilizing transformed  $\log_2$  RNA-sequencing reads from PDB grown fungus; H3K9me3 and H3K27me3 and ATAC-seq, TPM values of mapped reads H3K9me3 ChIP-seq, H3K27me3 ChIP-seq, or Assay for transposase accessible chromatin respectively. Black boxes highlight LTR and Unsp elements in the core that have euchromatin profiles.

271

272 and H3K9 methylation, low RIP signal, generally higher than 50% GC content, higher  
273 levels of H3K27me3, more open with ATAC-seq signal, and higher transcription  
274 levels (Fig. 3D). The core versus LS location is not sufficient to fully explain the  
275 chromatin status, as there are many elements located in the core genome that share  
276 a similar profile with the LS elements (Fig. 3D, elements highlighted in black boxes),  
277 but as an ensemble, the core elements are statistically different than those found at  
278 LS regions.

279

### 280 **Significantly different chromatin status between core and LS regions extends** 281 **to larger DNA segments**

282 The analysis of TEs in the genome clearly shows that a subpopulation of elements  
283 that occur in the previously defined LS regions have different epigenetic  
284 modifications and physical openness compared to those in the core genome. LS  
285 regions are significant for *V. dahliae* biology as they code many proteins which  
286 support host infection. To capture a more global view of core versus LS regions, the  
287 genome was analyzed using 10 kb non-overlapping windows, revealing the same  
288 global patterns along the linear chromosome sequence; regions with high TE  
289 density tend to have lower %GC content, higher DNA and H3K9 methylation and a

290 lack of ATAC-seq reads. The distribution of H3K27me3 appears more complicated.  
291 This mark overlaps with that of DNA and H3K9 methylation, as nearly all regions  
292 with these two modifications also have H3K27me3, yet we observed additional  
293 regions that contain only H3K27me3 and lack DNA and H3K9 methylation (Fig. 4A).  
294 The regions that contain DNA methylation and H3K9me3 are nearly identical and  
295 for simplicity refer to these regions going forward as being marked by H3K9me3.  
296 Interestingly, regions marked by H3K27me3 that lack H3K9me3 have more open  
297 DNA than region with H3K27me3 also containing H3K9me3 (Fig. 4A, ATAC). This is  
298 apparent for the LS regions that appear to have increased H3K27me3 signal, lack  
299 H3K9me3 and are less open than the genomic background but not as closed as the  
300 regions marked by H3K9me3 (Fig. 4B, regions marked by grey boxes). PCA was  
301 again employed to combine the variables into a single analysis, with the first  
302 dimension explaining nearly 60% of the variation in the data (Fig. 4C). The first  
303 dimension largely captures the variables describing euchromatin versus  
304 heterochromatin, such that ATAC-seq and %GC are furthest separated on the x-axis  
305 from H3K9me3, DNA methylation and TE density (Fig. 4C). Interestingly, the DNA  
306 segments classified as core are mostly associated with this separation across the  
307 first-dimension (Fig. 4C). The second and third dimensions of the PCA explained a  
308 similar amount of variation in the data; 14.4% and 10.7%, respectively. Data from  
309 the RNA-seq experiment contributed nearly all the information to the second  
310 dimension (Supplemental Fig. S4), while the H3K27me3 ChIP-seq data contributed  
311 most of the information in the third dimension (Supplemental Table S3).  
312 Interestingly, when this third dimension is considered, we observe a strong  
313 separation of the core from the LS regions (Fig. 4C, y-axis), suggesting that the LS  
314 regions of the genome are less defined by DNA openness, and DNA or H3K9  
315 methylation but more by H3K27me3 and transcriptional activity.

316 Our observations can be summarized into a genome-wide model; for the core  
317 genome, regions with higher TE density have low ATAC-seq signal (closed DNA) and  
318 elevated H3K9me3 signal and thus represent the heterochromatic regions (Fig. 4D,  
319 cluster of large blue dots plotted at middle left). Core genomic regions that are gene-  
320 rich have a higher ATAC-seq and lower H3K9me3 signal, and represent the

321 euchromatic portion of the genome (Fig. 4D, cluster of small blue dots plotted in the  
 322 lower-middle section). The LS regions are a hybrid of the two that contain high TE  
 323 density and higher H3K27me3 signal but have higher ATAC-seq signals when  
 324 compared with similar TE containing regions in the core genome (Fig. 4D, cluster of  
 325 large yellow triangles plotted in the middle). This simple model of the genome  
 326 accounts for many of the phenomena described here, and links the epigenome,  
 327 physical genome and functional genome.  
 328

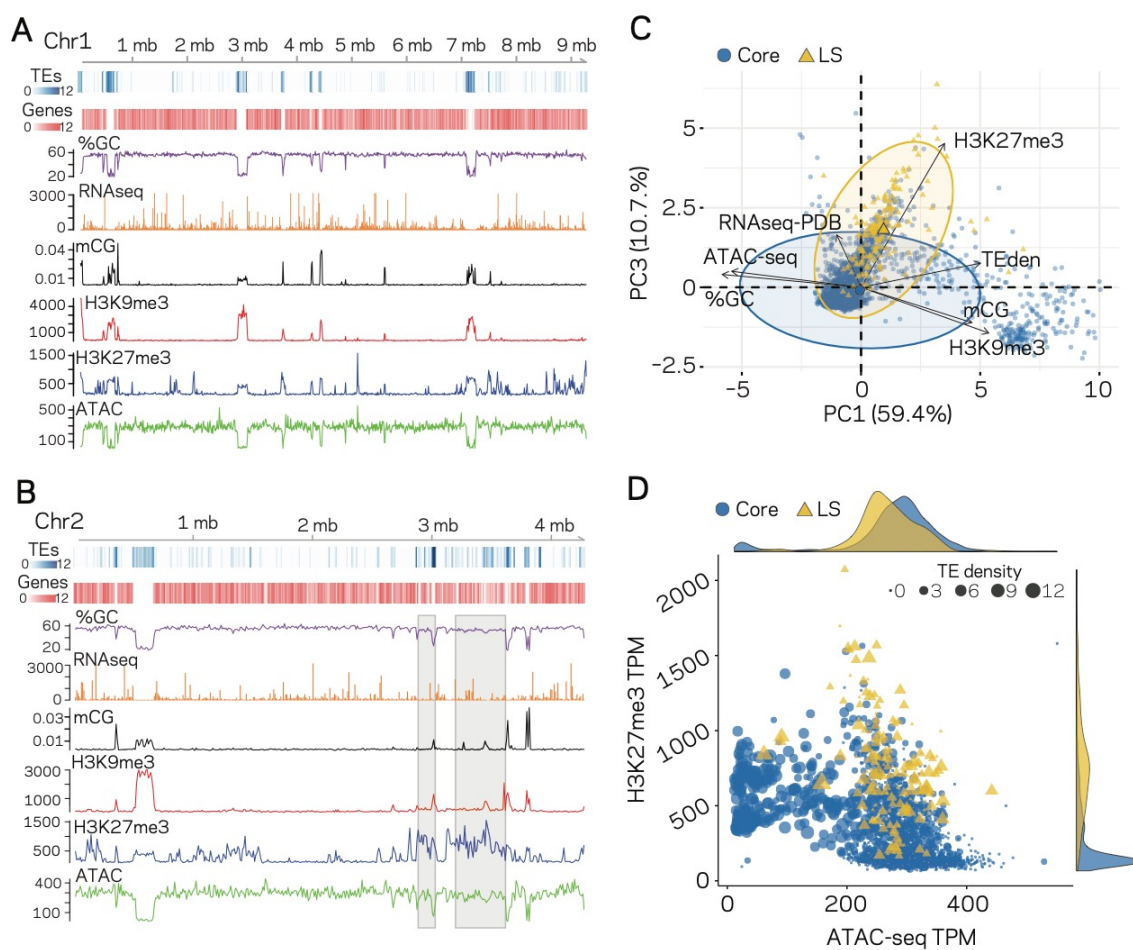

329

Figure 4. Epigenome and physical DNA characteristics collectively define core and LS regions. (A and B) Whole chromosomes plots showing TE and gene counts over 10 kb genomic windows, blue and red heatmaps respectively. The %GC content is shown in purple, RNA-seq shown in orange, CG cytosine DNA methylation shown in black, H3K9me3 and H3K27me3 ChIP-seq shown in red and blue respectively, and ATAC-seq shown in green. Values are those previously described. (B) Two LS regions are highlighted with a grey window. (C) Principle component analysis for seven variables at each 10 kb window. Dimension 1 and 3 are plotted and collectively explain ~70% of the variation in the data. The individual symbols are colored by genomic location with core (blue circles) and LS (yellow triangles). Colored ellipses show the confidence interval for the core and LS elements with a single large symbol to show the mean. (D) Scatter plot of the 10 kb windows colored for core and LS location by ATAC-seq data (TPM, x-axis) and H3K27me3 (TPM, y-axis). The size of each symbol is proportional to the TE density shown in the upper right corner. The density plot of each variable is shown on the opposite axis.

330

331

332 **Machine learning predicts more lineage-specific genomic regions than**  
333 **previously considered**

334 Given that a clear model emerges that links the epigenome and physical openness of  
335 DNA with adaptive regions of the genome, we assessed the extent to which these  
336 features can predict core or LS regions. Stimulated by our observations (Fig. 4), we  
337 used ATAC-seq, RNA-seq, H3K27me3, TE density, and H3K9me3 along with the  
338 binary classification of the 10 kb windows as core or LS for machine learning. Four  
339 supervised machine learning algorithms were used to train (i.e. learn) on 80% of the  
340 data (2890 regions), while the remaining 20% (721 regions) were used for  
341 prediction (i.e. test), using a 10-fold cross validation repeated three times. Assessing  
342 the classifier's performance using area under the receiver operating characteristic  
343 (auROC) curve suggested excellent results ranging from 0.94 to 0.95, with a value of  
344 1 being perfect prediction (Fig. 5A). While auROC is the *de facto* standard for  
345 machine learning performance<sup>59</sup>, it is not appropriate for assessing predictive  
346 performance of binary classification problems when the two classes are heavily  
347 skewed as it overestimates performance due to the high number of true negatives<sup>60</sup>.  
348 This is the case for our analysis in which the test set (721 regions) contains only 33  
349 of the known LS regions (4.6%). To more accurately assess model performance,  
350 precision-recall curves were employed as these do not use true negatives, and are  
351 therefore less influenced by skewed binary classifications<sup>61</sup>. All four algorithms



352 consistently outperformed a random classifier, with the boosted classification tree  
353 (BCT) and stochastic gradient boosting (GMB) algorithms having the same highest  
354 area under the precision-recall curve of 0.52 (Fig. 5B). However, the confusion  
355 matrix indicated that the BCT model only identified 13 of the 33 LS regions (Table  
356 2), resulting in poor recall (Table 3). In contrast, the other three models did identify  
357 most of the known LS regions (high recall), but had lower precision caused by the  
358 high rate of false positives (Table 2 and 3). The Matthews correlation coefficient  
359 (MCC), an analogous measure to accuracy but more appropriate for unbalanced  
360 binary classification, indicated that the GMB and random forest (RF) models  
361 performed the best (Table 3).  
362

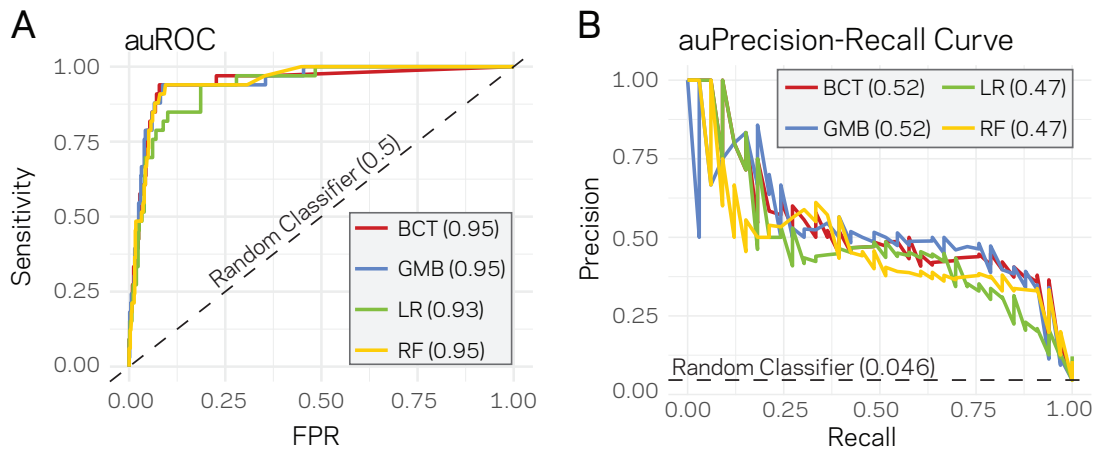

Figure 5. Supervised machine learning can predict LS regions based on epigenome and physical genome characteristics. (A) Area under the Response operator curve (auROC) plotting sensitivity and false positive rate (FPR) for four machine learning algorithms, BCT- Boosted classification tree; GMB- stochastic gradient boosting; LR- logistic regression; RF- random forest. The auROC scores are shown next the algorithm key in the grey box. The black dotted line represents the performance of a random classifier. Perfect model performance would be a curve through point (0,1) in the upper left corner. (B) Area under the Precision-Recall curve for the same four models shown in A. Area under the curves are shown in the figure key in the grey box. The black dashed line shows the performance of a random classifier, calculated as the TP / (TP + FN). Perfect model performance would be a curve through point (1,1) in the upper right corner.

363  
364  
365  
366  
367  
368  
369

370 Table 2. Confusion Matrix for LS versus core prediction in *V. dahliae*

|     |                | Known |    |
|-----|----------------|-------|----|
|     |                | Core  | LS |
| LR  | Predicted Core | 638   | 7  |
|     | Predicted LS   | 50    | 26 |
| GMB | Predicted Core | 645   | 5  |
|     | Predicted LS   | 43    | 28 |
| BCT | Predicted Core | 672   | 20 |
|     | Predicted LS   | 16    | 13 |
| RF  | Predicted Core | 623   | 2  |
|     | Predicted LS   | 65    | 31 |

371 LR, Logistic Regression; GMB, Stochastic Gradient Boosting; BCT, Boosted  
 372 Classification Tree; RF, Random Forest; Core, regions of the genome defined as core;  
 373 LS, regions of the genome defined as Lineage Specific.

374

375 Table 3. Assessment values for the four tested machine learning algorithms used to  
 376 classify genomic regions.

| Models | Precision | Recall | MCC  | F1   | F2   |
|--------|-----------|--------|------|------|------|
| LR     | 0.34      | 0.79   | 0.49 | 0.48 | 0.63 |
| GMB    | 0.39      | 0.85   | 0.55 | 0.54 | 0.69 |
| BCT    | 0.45      | 0.39   | 0.39 | 0.42 | 0.40 |
| RF     | 0.32      | 0.94   | 0.52 | 0.48 | 0.68 |

377 LR, Logistic Regression; GMB, Stochastic Gradient Boosting; BCT, Boosted  
 378 Classification Tree; RF, Random Forest; MCC, Matthews Correlation Coefficient.

379

380 The results indicate that the machine learning algorithms are well-suited to identify  
 381 the previously known LS regions in the test data at a high rate. Additionally, the  
 382 algorithms identified a relatively large number of regions as LS that were previously  
 383 classified core. The original classification of core and LS in *V. dahliae* was based on  
 384 presence/absence variations identified from genomic information of only few  
 385 strains<sup>14,15</sup>. Consequently, we reasoned that regions here classified as LS by the  
 386 machine learning algorithms could be genuine LS regions that were originally  
 387 missed due to the limited diversity of the *V. dahliae* represented by the strains  
 388 sequenced. The two best models from the initial testing, GMB and RF, predicted a  
 389 total of 96 and 81 regions as LS respectively, suggesting there could be 2 to 3 times  
 390 more LS DNA than previously identified. To improve the genome-wide estimate and

391 to further assess the robustness of machine learning for LS region prediction, we re-  
392 ran the GMB and RF algorithms on 15 new training-test splits, independently  
393 training and predicting on each set (see methods for details). This approach nearly  
394 saturated the genome, providing multiple predictions per window and only 124 of  
395 the 3611 regions were missed (Supplemental Fig. S5). The average MCC  
396 performance estimate of the GMB and RF classifiers were 0.53 and 0.48 over the 15  
397 runs, and our results indicate consistent performance across the independent  
398 predictions (Fig. 6A, Supplemental Fig. S6, Supplemental Table S4 and S5). The GMB  
399 classifier predicted a total of 285 of the 10 kb regions as LS, while the RF classifier  
400 predicted 388 (Supplemental Table S6 and S7). The LS predictions for the two  
401 models were in agreement for 280 regions, which is 98% of the GMB predictions  
402 and 72% of those from the RF (Fig. 6B), overall showing high agreement between  
403 the two classifiers. Consensus predictions were generated from the two classifiers if  
404 a region was predicted as LS by both models, and a conservative joining step was  
405 employed in which a single predicted core region was called LS if it was flanked by  
406 LS predictions on both sides (see methods). This resulted in a total of 280 regions  
407 predicted as LS by both classifiers and an additional 41 regions due to the joining. In  
408 total, this new classification nearly doubles the total amount of LS regions compared  
409 with the original observations<sup>14,15</sup>. The original classification of LS regions in *V.*  
410 *dahliae* clustered in four larger regions<sup>14,15</sup>. We were interested to understand the  
411 physical genomic location of the originally identified and the newly predicted LS  
412 regions. The results of the individual classifiers reveal that the new regions are also  
413 not randomly dispersed across the genome (Supplemental Fig. S7). The consensus  
414 prediction from the two classifiers identified the large blocks of LS regions from the  
415 original observations, along with new clusters of LS regions such as those on  
416 chromosomes 4, 6, and 8 (Fig. 6C and 6D). Importantly, the newly defined set of LS  
417 regions supports a clearer separation of the LS regions from the core regions  
418 (Supplemental Fig. S8). Collectively, these analyses suggest that the machine  
419 learning algorithms can be used to predict new LS regions based on epigenetic and  
420 physical DNA accessibility data. The identification of potentially new LS regions

421 missed in the original classification provides new avenues to identify proteins  
 422 important for host infection and adaptation. These results support that genome  
 423 structure is influencing genome function, demonstrates a machine learning  
 424 approach for predictive biology, and advances our biological understanding of  
 425 genome function.

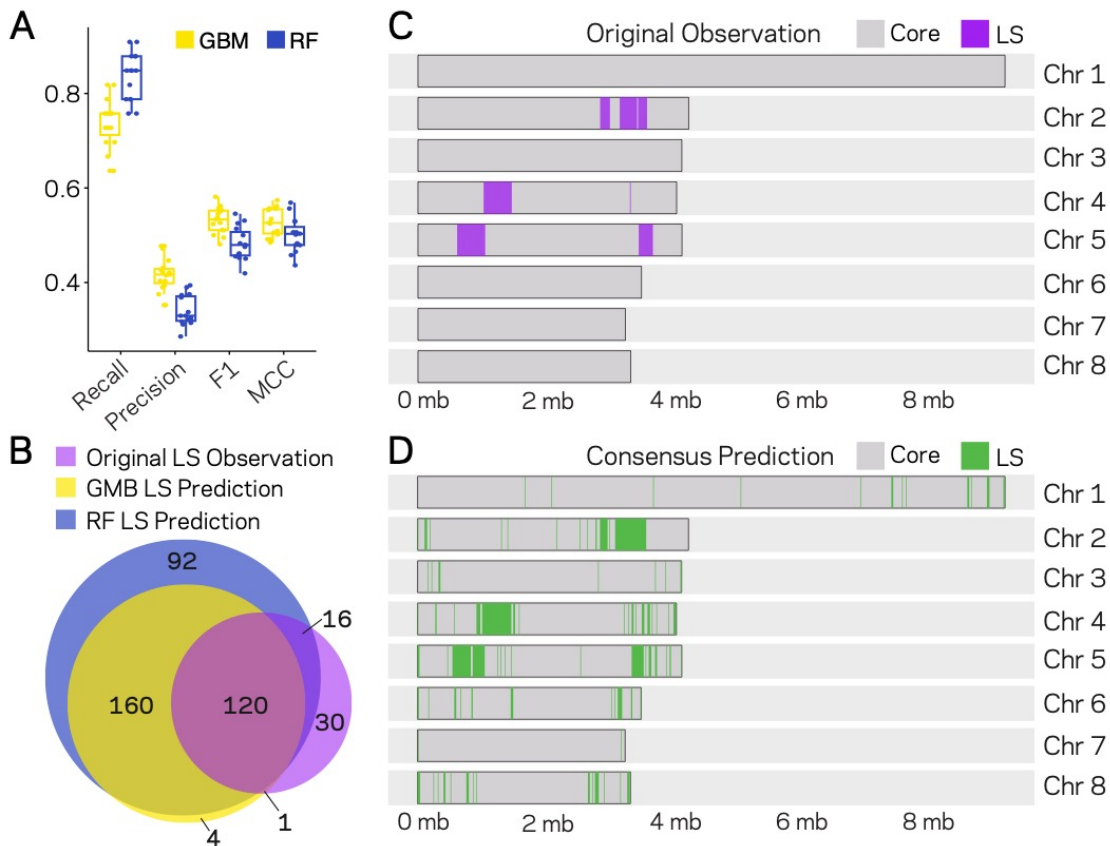

Figure 6. Machine Learning predictions for genome-wide LS content. (A) Two machine learning algorithms, Stochastic Gradient Boosting (GMB) and Random Forest (RF), were used to predict LS regions from 15 independent training-test splits. For each split, 80% of the data were used to train and the remaining 20% were used for prediction. Classifier performance was measured for each of the 15 trials, and summarized as a boxplot with each trial represented as a point. (B) Venn diagram showing the overlap between the results of the two classifiers and the original observations of LS regions (Faino et al. 2016). Each slice of the diagram shows the number of LS regions predicted, see methods for additional details. (C and D) Schematic representation of the eight chromosomes (labeled on right) of *V. dahliae* strain JR2. Each chromosome was divided into 10 kb windows for prediction. Regions classified as core are shown in grey and LS as their indicated color. (C) Original observations of core and LS regions, grey and purple respectively. The five main LS regions can be seen on chromosome 2, 4 and 5. (D) The consensus model predictions for core and LS regions shown in grey and green respectively. The consensus predictions were those made by both the GMB and RF model (in total 280). Regions predicted as LS were joined if they were interrupted by a single window of Core prediction, adding an additional 41 LS regions for a final number of 321 LS regions in the *V. dahliae* JR2 genome.

## 426 **DISCUSSION**

427 Significant efforts to detail genomes of filamentous pathogens, to understand  
428 variation within species, and to a lesser extent to examine epigenetic modifications,  
429 have increased our understanding genome function in this important group of  
430 organisms <sup>16,54,62</sup>. Understanding pathogen genome evolution is of great interest to  
431 help combat emerging pathogens, and to broaden our knowledge of genome biology  
432 beyond model eukaryotes. Here we present a detailed analysis of the epigenome and  
433 physical DNA accessibility of the vascular wilt pathogen *V. dahliae* and link these  
434 analyses to previous characterizations of genomic regions contributing to host  
435 colonization and adaptation <sup>13-16</sup>. A clear picture emerges in which the core genome  
436 is organized into heterochromatic and euchromatic regions. The heterochromatin is  
437 characterized by a high density of TEs with low GC content, high levels of DNA and  
438 H3K9 methylation, low DNA accessibility and clear signatures of RIP mutations at  
439 repetitive sequences. The euchromatin regions are opposite in all characteristics,  
440 and this collective description is consistent with previous research in many other  
441 eukaryotic genomes <sup>32,63,64</sup>. Interestingly, we provide evidence that previously  
442 defined LS regions of the genome, characterized for their role in contributing to host  
443 infection, exist in an intermediate chromatin state, having higher TE density than  
444 the euchromatic regions, yet are devoid of DNA and H3K9 methylation.  
445 Furthermore, LS regions have higher DNA accessibility than the core  
446 heterochromatic regions and are more transcriptionally active, but they are less  
447 accessible than the ‘true’ euchromatic gene-rich core regions. Notably, LS regions  
448 are characterized as having a strong association with H3K27me3, similar to the  
449 discovery that SM gene clusters are enriched at H3K27me3 regions in *F.*  
450 *graminearum* <sup>29</sup>. Our results demonstrate that LS regions are by definition not  
451 heterochromatic, as they are far more accessible than the true heterochromatin, and  
452 yet they typically contain many heterochromatin features. We note previous  
453 descriptions of contradictory heterochromatin states <sup>65</sup>, and the broad possible  
454 chromatin states that may characterize a genome <sup>33</sup>. However, few previous

455 analyses have assessed the relationship between DNA and histone modifications  
456 with DNA accessibility in light of biological function of genomic adaptation.

457

458 Our results support the hypothesis that chromatin structure underlies genome  
459 function. More specifically that chromatin modifications and DNA accessibility  
460 contribute to genome evolution, not just via transcriptional control but also  
461 regarding the architecture of the genome<sup>50</sup>. Along with the described associations,  
462 we were able to predict LS regions using machine learning. The results of running  
463 four machine learning algorithms trained on H3K9 and H3K27 methylation, RNA-  
464 sequencing, TE density and DNA accessibility data, shows these variables could be  
465 used to classify DNA segments as core versus LS with high recall (i.e. sensitivity).  
466 The RF model showed the highest recall, correctly classifying 31 of the previously  
467 observed 33 LS regions in spite of their skewed presence in the data at nearly 1:20  
468 LS to core. The precision assessment of the algorithms was low because each model  
469 classified regions as LS that were originally observed as core, statistically termed  
470 false positives. However, the original observations represent operational  
471 classification based on then available data. Consensus predictions based on the two  
472 highest performing models extended the boundaries of the previous LS regions and  
473 identified new potentially clustered LS regions. Thus, the use of machine learning  
474 can extend our knowledge of biology and identify novel genomic regions to search  
475 for as of yet uncharacterized genes with important adaptive roles. Collectively, we  
476 interpret our results to indicate a strong link between the epigenome, physical DNA  
477 accessibility and the occurrence of LS regions in *V. dahliae*. Our findings however  
478 have limited inference on causation versus association, an important area for future  
479 research. If there is a causative relationship between genome structure and function  
480 it is interesting to consider who drives whom- do the LS regions dictate altered  
481 chromatin or does altered chromatin dictate LS formation?

482

483 It is currently not possible to extend our machine learning predictions to additional  
484 filamentous pathogen genomes, as the necessary data are not currently publicly  
485 available. However, for many filamentous plant pathogens it is clear that genome

486 variation on multiple scales, from SNPs to large structural variation, are not  
487 uniformly distributed in the genome<sup>29</sup>. Recent reports from the fungal pathogen *Z.*  
488 *tritici* addressed the role of genome stability and H3K27me3 during asexual  
489 reproduction<sup>53,66</sup>. During experimental evolution, individual strains of *Z. tritici*  
490 readily lose accessory chromosomes. The authors observed that a mutant lacking  
491 the enzyme responsible for H3K27me3 showed less accessory chromosome loss and  
492 concluded that H3K27me3 destabilizes chromosome structure<sup>53</sup>. However,  
493 accessory chromosome losses were clearly biased in their individual frequency and  
494 changes were not reported for core chromosomes, despite H3K27me3 being found  
495 at high levels on accessory and regions of core chromosomes<sup>67</sup>. Therefore, the  
496 observed genome destabilization requires additional determinants in conjunction  
497 with H3K27me3 which remain to be discovered. Results presented here suggest that  
498 DNA and histone methylation marks and physical DNA accessibility are important  
499 additional determinants to distinguish accessory and LS regions of the genome.  
500 However, we acknowledge that our model does not strictly differentiate all LS  
501 region in the *V. dahliae* genome, as there are LS and core regions that have very  
502 similar overall chromatin profiles, and therefore these features alone are not  
503 sufficient. One factor that could explain part of this discrepancy is that LS formation  
504 is likely not fully deterministic. Evolution is a stochastic process, and it seems  
505 unlikely that LS formation can be described in absolute terms. Rather, it is more  
506 likely to be a probabilistic process, in which specific chromatin and physical status  
507 increases the likelihood for formation and maintenance of LS regions. The results  
508 presented here offer an exciting new link between the epigenome, physical DNA  
509 accessibility and adaptive genome evolution.

510

## 511 **METHODS**

### 512 **Fungal growth and strain construction**

513 *V. dahliae* strain JR2 (CBS 143773) was used for experimental analysis<sup>68</sup>. The strain  
514 was maintained on potato dextrose agar (PDA) (Oxoid, Thermo Scientific, CM0139)  
515 and grown at 22°C in the dark. For liquid grown cultures, conidiospores were

516 collected from PDA plates after approximately two weeks and inoculated into flasks  
517 containing the desired media at a concentration of  $2 \times 10^4$  spores per mL. Media used  
518 in this study include PDA, half-strength Murashige and Skoog plus vitamins (HMS)  
519 (Duchefa-Biochemie, Haarlem, The Netherlands) medium supplemented with 3%  
520 sucrose and xylem sap (abbreviated, X) collected from greenhouse grown tomato  
521 plants of the cultivar MoneyMaker. Liquid cultures were grown for four days in the  
522 dark at  $22^\circ\text{C}$  and 160 RPM. The cultures were strained through miracloth ( $22 \mu\text{m}$ )  
523 (EMD Millipore, Darmstadt, Germany), pressed to remove liquid, flash frozen in  
524 liquid nitrogen and ground to powder with a mortar and pestle. Samples were  
525 stored at  $-80^\circ\text{C}$  if required prior to nucleic acid extraction.

526 The *Δhp1* strain was constructed as previously described<sup>69</sup>. Briefly, the genomic  
527 DNA regions flanking the 5' and 3' HP1 coding sequence were amplified (*left border*,  
528 For. Primer, 5'-GGTCTTAAUGACCTGAAGAATCGAGCAAGGA and  
529 Rev. primer, 5'-GGCATTAAUATGAAAGCACCGGGATTTTTCT; *right border*,  
530 For. Primer, 5'-GGACTTAAUATGCTGTTGGGAGGCAGAATAA  
531 Rev. primer, 5'-GGGTTTAAUCCACGTAGATGGAGGGGTAGA). The PCR products were cloned  
532 in to the pRF-HU2 vector system<sup>70</sup> using USER enzyme following manufactured  
533 protocol (New England Biolabs, MA, USA). Correctly ligated vector was transformed  
534 into *Agrobacterium tumefaciens* strain AGL1 used for *V. dahliae* spore  
535 transformation<sup>69</sup>. Colonies of *V. dahliae* growing on hygromycin B selection after 5  
536 days were moved to individual plates containing PDA and hygromycin B. Putative  
537 transformants were screened using PCR to check for deletion of the HP1 sequence  
538 (For. Primer, 5'- AATCCCGCAAGGGAAAAGAGAC and Rev. primer, 5'-  
539 CGTGTGCTTTGTCTTCTGACCA) and the integration of the hygromycin B sequence (For.  
540 Primer, 5'- TGGAATATGCCACCAGCAGTAG and Rev. primer, 5'- GGAGTCGCATAAGGGAGAGCG) at  
541 the specific locus.

542

### 543 **Bisulfite sequencing and analysis**

544 The wild-type *V. dahliae* strain and *Δhp1* were grown in liquid PDA for three days,  
545 flash frozen and collected as described earlier. Extracted DNA was sent to the



546 Beijing Genome Institute (BGI) for bisulfite conversion, library construction and  
547 Illumina sequencing. Briefly, the DNA was sonicated to a fragment range of 100-300  
548 bp, end-repaired and methylated sequencing adapters were ligated to 3' ends. The  
549 EZ DNA Methylation-Gold kit (Zymo Research, CA, USA) was followed according to  
550 manufacturer guidelines for bisulfite conversion of non-methylated DNA. Libraries  
551 were paired-end 100bp sequenced on an Illumina HiSeq 2000.

552

553 Whole-genome bisulfite sequencing reads were analyzed using the BSMAP pipeline  
554 (v. 2.73) and methratio script <sup>71</sup>. The results were partitioned into CG, CHG and CHH  
555 cytosine sites for analysis. Only cytosine positions containing greater than 4  
556 sequencing reads were included for analysis. Methylation levels were summarized  
557 as weighted methylation percentage, calculated as the number of reads supporting  
558 methylation over the number of cytosines sequenced or as fractional methylation,  
559 calculated as the number of methylated cytosines divided by all cytosine positions  
560 <sup>72</sup>. For fractional methylation, a cytosine was considered methylated if it was at least  
561 5% methylated from all the reads covering that cytosine. As such, weighted  
562 methylation captures quantitative aspects of methylation, while fractional  
563 methylation is more qualitative. Weighted and fractional methylation were  
564 calculated over intervals described in the text, including genes, promoters (defined  
565 as the 300 bp upstream of the translation start site), transposable elements and 10  
566 kb windows. For each feature, weighted and fractional methylation were calculated  
567 from the sum of the mapped reads or the sum of the positions, respectively, over the  
568 analyzed region. Two sample comparisons were computed using base R <sup>73</sup> to  
569 compute the non-parametric Mann-Whitney U test (equivalent to the two-sample  
570 Wilcoxon rank-sum test). Principle component analyses were computed in R using  
571 the packages FactoMineR (v 1.42) <sup>74</sup> and factoextra (v 1.0.5) <sup>75</sup>.

572

### 573 **Transposable element annotation**

574 Repetitive elements were identified in the *V. dahliae* stains JR2 genome assembly <sup>68</sup>  
575 as well as in three other high-quality *V. dahliae* genome assemblies <sup>16</sup> using a

576 combination of LTRharvest<sup>76</sup> and LTRdigest<sup>77</sup> followed by *de novo* identification of  
577 RepeatModeler<sup>78</sup>. Briefly, LTR sequences were identified (recent and ancient LTR  
578 insertions) and subsequently filtered, e.g. for occurrence of primer binding sites or  
579 for nested insertions (see procedure outlined by Campbell and colleagues for details  
580<sup>79</sup>). Prior to the *de novo* prediction with RepeatModeler, genome-wide occurrences  
581 of the identified LTR elements are masked. Predicted LTR elements and the *de novo*  
582 predictions from RepeatModeler were subsequently combined, and the identified  
583 repeat sequences of the four *V. dahliae* strains were clustered using vsearch (80%  
584 sequence identity, search on both strands; v 2.4.4)<sup>80</sup>. A non-redundant *V. dahliae*  
585 repeat library that contained consensus sequences for each cluster (i.e. repeat  
586 family) was constructed by performing multiple sequence alignments using MAFFT  
587 (v7.271)<sup>81</sup> followed by the construction of a consensus sequence as described by  
588 Faino et al.<sup>15</sup>. The consensus repeat library was subsequently manually curated and  
589 annotated (Wicker classification<sup>82</sup>) using PASTEC (default databases and settings;  
590 search in the reverse-complement sequence enabled)<sup>83</sup>, which is part of the REPET  
591 pipeline (v2.2)<sup>84</sup>, and similarity to previously identified repetitive elements in *V.*  
592 *dahliae*<sup>68,85</sup>. The occurrence and location of repeats in the genome assembly of *V.*  
593 *dahliae* strain JR2 were determined using RepeatMasker (v 4.0.7; sensitive option).  
594 The Repeatmasker output was post-processed using ‘One code to find then all’<sup>86</sup>  
595 which supports the identification and combination of multiple matches (for instance  
596 due to deletions or insertions) into combined, representative repeat occurrences.  
597 We only further considered matches to the repeat consensus library, and thereby  
598 excluded simple repeats and low-complexity regions. To estimate divergence time  
599 of TEs, each individual copy of a transposable element was aligned to the consensus  
600 of its family using needle, which is part of the EMBOSS package<sup>87</sup>. Sequence  
601 divergence between the TEs and the TE-family consensus was corrected using the  
602 Jukes-Cantor distance, with a correction term that accounts for insertions and  
603 deletions<sup>88,89</sup>. The composite RIP index (CRI) was calculated as previously  
604 described<sup>43</sup>. Briefly, CRI was determined by subtracting the RIP substrate from the  
605 RIP product index, which are defined by dinucleotide frequencies as follows: RIP

606 product index = (TpA / ApT) and the RIP substrate index = (CpA + TpG/ ApC + GpT).  
607 Positive CRI values indicate the analyzed sequences were subjected to the RIP  
608 process. For TE analysis, elements that are less than 100 bp were removed.

609

### 610 **RNA-sequencing and analysis**

611 *V. dahliae* strain JR2 (CBS 143773) was grown in triplicate liquid media PDB, HMS  
612 and xylem sap as described. RNA extraction was carried out using TRIzol (Thermo  
613 Fisher Science, Waltham, MA, USA) following manufacturer guidelines. Following  
614 RNA re-suspension, contaminating DNA was removed using the TURBO DNA-free kit  
615 (Ambion, Thermo Fisher Science, Waltham, MA, USA) and RNA integrity was  
616 estimated by separating 2  $\mu$ L of each sample on a 2% agarose gel and quantified  
617 using a Nanodrop (Thermo Fisher Science, Waltham, MA, USA) and stored at -80°C.  
618 Library preparation and sequencing was carried out at BGI. Briefly, mRNA were  
619 enriched based on polyadenylation purification and random hexamers were used  
620 for cDNA synthesis. RNA-sequencing libraries were constructed following end-  
621 repair and adapter ligation protocols and PCR amplified. Purified DNA fragments  
622 were single-end 50bp sequenced on an Illumina HiSeq 2000.

623

624 Reads were mapped to the *V. dahliae* stain JR2 genome assembly<sup>68</sup> using STAR (v  
625 2.6.0) with settings (`--sjdbGTFfeatureExon exon, --sjdbGTFtagExonParentTranscript`  
626 `Parent, --alignIntronMax 400, --outFilterMismatchNmax 5, --outFilterIntronMotifs`  
627 `RemoveNoncanonical`)<sup>90</sup>. Mapped reads were quantified using the  
628 `summarizeOverlaps` and variance stabilizing transformation (`vst`) features of  
629 DESeq2<sup>91</sup>. For TE analysis, the coordinates of the annotated TEs were used as  
630 features for read counting. To perform RNAseq analysis over whole genome 10 kb  
631 regions, raw mapped reads were summed over 10 kb bins using bedtools (v 2.27)<sup>91</sup>  
632 and converted to Transcripts Per Million (TPM) and averaged over the three reps  
633 for analysis.

634

635

636

637 **Chromatin immunoprecipitation and sequencing and analysis**

638 *V. dahliae* strain JR2 was grown in PDB and materials was collected as described.

639 Approximately 400 mg ground material was resuspended in 4 ml ChIP Lysis buffer

640 (50 mM HEPES-KOH pH7.5, 140 mM NaCl, 1 mM EDTA, 1% Triton X-100, 0.1%

641 NaDOC) and dounced 40 times in a 10 cm<sup>3</sup> glass tube with tight fitting pestle on 800

642 power with a RZR50 homogenizer (Heidolph, Schwabach, Germany), followed by

643 five rounds of 20 seconds sonication on ice with 40 seconds rest between rounds

644 with a Soniprep 150 (MSE, London, UK). Samples were redistributed to 2 ml tubes

645 and pelleted for 2 min at max speed in tabletop centrifuge. The supernatants were

646 combined, together with 20 µl 1M CaCl<sub>2</sub> and 2.5µl MNase, and after 10 minutes of

647 incubation in a 37°C water bath with regular manual shaking, 80 µl 0.5M EGTA was

648 added and tubes were put on ice. Samples were pre-cleared by adding 40 µl Protein

649 A Magnetic Beads (New England Biolabs, MA, United States) and rotating at 4°C for

650 60 min, after which the beads were captured, 1 ml fractions of supernatant were

651 moved to new 2 ml tubes containing 5 µl H3K9me3 or H3K27me3 antibody

652 (ActiveMotif ; #39765 and #39155) respectively and incubated overnight with

653 continuous rotation at 4°C. Subsequently, 20 µl protein-A magnetic beads were

654 added and incubated for 3 hours at 4°C, after which the beads were captured on a

655 magnetic stand and subsequently washed with 1 ml wash buffer (50 mM Tris HCl

656 pH 8, 1 mM EDTA, 1% Triton X-100, 100 mM NaCl), high-salt wash buffer (50 mM

657 Tris HCl pH 8, 1 mM EDTA, 1% Triton X-100, 350 mM NaCl), LiCl wash buffer (10

658 mM Tris HCl pH8, 1 mM EDTA, 0.5% Triton X-100, 250 mM LiCl), TE buffer (10 mM

659 Tris HCl pH 8, 1mM EDTA). Nucleosomes were eluted twice from beads by addition

660 of 100µl pre-heated TES buffer (100 mM Tris HCl pH 8, 1% SDS, 10 mM EDTA, 50

661 mM NaCl) and 10 minutes incubation at 65°C. 10mg /ml 2µl Proteinase K (10mg

662 /ml) was added and incubated at 65°C for 3 hours, followed by chloroform clean-up.

663 DNA was precipitated by addition of 2 volumes 100% ethanol, 1/10th volume 3 M

664 NaOAc pH 5.2 and 1/200th volume 120 mg/ml glycogen, and incubated overnight at

665 -20°C. Sequencing libraries were prepared using the TruSeq ChIP Library

666 Preparation Kit (Illumina) according to instructions, but without gel purification and

667 with use of the Velocity DNA Polymerase (BioLine, Luckenwalde, Germany) for 25  
668 cycles of amplification. Single-end 125bp sequencing was performed on the Illumina  
669 HiSeq2500 platform at KeyGene N.V. (Wageningen, the Netherlands).

670

671 Reads were mapped to the reference JR2 genome, using BWA-mem with default  
672 settings<sup>92</sup>. For CHIP and ATAC-seq mapping, three regions of the genome were  
673 masked due to aberrant mapping, possibly owing to sequence similarity to the  
674 mitochondrial genome (chr1:1-45000, chr2:3466000-3475000, chr3:1-4200). This  
675 is similar to what is described as blacklisted regions in other eukaryotic genomes<sup>93</sup>.  
676 The raw mapped reads were counted either over the TE coordinates or 10 kb  
677 intervals for the two separate analyses. The raw mapped reads were converted to  
678 TPM and the average of the two replicates was used for analysis.

679

#### 680 **Assay for Transposase-Accessible Chromatin (ATAC)-sequencing and analysis**

681 The *V. dahliae* strain JR2 (CBS 143773) was grown in PDB liquid media as described.  
682 Mycelium was collected, filtered, rinsed and flash frozen in liquid nitrogen. The  
683 ATAC-seq procedure was carried out mainly as described previously<sup>94</sup>. Nuclei were  
684 collected by resuspending ground mycelium in 5 mL of ice-cold Nuclei Isolation  
685 Buffer (NIB) (100 mM NaCl, 4mM NaHSO<sub>4</sub>, 25mM Tris-HCl, 10mM MgSO<sub>4</sub>, 0.5mM  
686 EDTA, 0.5% NP-40 including protease inhibitors added at time of extraction, 2 mM  
687 Phenylmethanesulfonyl fluoride (PMSF), 100 μM Leupeptin, 1 μg/mL Pepstatin, 10  
688 μM E-64). The homogenate was layered onto 10-mL of an ice-cold sucrose-Ficoll  
689 gradient (bottom layer 5mL of 2.5M sucrose in 25mM Tris-HCl, 5mL 40% Ficoll 400  
690 (GE Biosciences Corporation, NJ, USA)). Nuclei were separated into the lower phase  
691 by centrifugation at 2000g for 30 min at 4°C. The upper layer was discarded and the  
692 lower phase (~4mL) moved to another collection tube containing 5mL of ice-cold  
693 NIB. Nuclei were pelleted at 9000g for 15 min at 4°C and re-suspended in 3 mL of  
694 NIB. The integrity of the nuclei and their concentration in the solution were  
695 estimated by DAPI staining (DAPI Dilactate 5mg/mL, used at a 1/2000 dilution for  
696 visualization) and counted on a hemocytometer. A total of 200,000 nuclei were

697 transferred to a 1.5mL microfuge tube, and nuclei pelleted at 13000g for 15 min at  
698 4°C and resuspended in the transposition reaction (20uL of 2x Nextera reaction  
699 buffer, 0.5uL of Nextera Tn5 Transposase, 19.5 uL of nuclease-free H<sub>2</sub>O) (Illumina,  
700 Nextera DNA library Preparation kit FA-121-1030) and the reaction was carried out  
701 for 5 minutes at 37°C. The reaction was halted and fragmented DNA purified using a  
702 MinuElute PCR purification kit (Qiagen, MD, USA). The eluted DNA was amplified in  
703 reaction buffer (10uL of transposased DNA, 10uL nuclease-free H<sub>2</sub>O, 2.5uL forward  
704 PCR primer (5'-AATGATACGGCGACCACCGAGATCTACACTCGTCGGCAGCGTCAGATGTG), 2.5uL  
705 reverse PCR primer  
706 (CAAGCAGAAGACGGCATAACGAGATTTCTGCCTGTCTCGTGGGCTCGGAGATGT) and 25uL  
707 NEBnext High-Fidelity 2x PCR Master Mix (New England Biolabs, MA, United  
708 States)) using thermo-cycler conditions described in <sup>94</sup> for a total of 9 cycles.  
709 Amplified library was purified using the MinElute PCR Purification Kit (Qiagen, MD,  
710 USA) and paired-end 100 bp sequenced on an Illumina HiSeq4000.

711

712 Reads were mapped to the reference JR2 genome with the described blacklisted  
713 regions masked, using BWA-mem with default settings <sup>92</sup>. The mapped reads were  
714 further processed to remove duplicates reads arising from library prep and  
715 sequencing using Picard toolkit *markDuplicates* <sup>95</sup>. The mapped reads were counted  
716 either over the TE coordinates or 10 kb intervals for the two separate analyses using  
717 bedtools *multicov* (v 2.27) <sup>96</sup>. The reads were converted to TPM values and those  
718 numbers used for analysis.

719

## 720 **Machine Learning and assessment**

721 The machine learning algorithms were implemented using the classification and  
722 regression training (caret) package in R <sup>73,97</sup>. The full set of genomic data was used  
723 to create a data frame comprising the genome in 10 kb segments as rows and the  
724 individual collected variables as columns. The regions were classified as core or LS  
725 based on the previous observations <sup>15</sup>. For initial model assessment and parameter  
726 tuning, the data were split into 80% for training and 20% used for testing (i.e.

727 prediction), and the proportion of core and LS regions were kept approximately  
728 equal in the two splits. For parameter tuning, repeated cross-validation of 10-fold 3-  
729 times was used and the best model was selected based on accuracy. Four algorithms  
730 were used- logistic regression, random forest, stochastic gradient boosting, and  
731 boosted classification tree. The model for all algorithms was classification = ATAC-  
732 seq<sub>TPM</sub> + ChIP-H3K27me3<sub>TPM</sub> + ChIP-H3K9me3<sub>TPM</sub> + TE<sub>density</sub> + PDB-RNAseq<sub>TPM</sub>.  
733 Logistic regression was run using method *glm*, family *binomial*. Random forest was  
734 run using method *rf* and tuneGrid [*mtry*= (1,2,3)]. The Stochastic Gradient Boosting  
735 was implemented with method *gbm* and tuneGrid [*interaction.depth*=(1,5,10),  
736 *n.trees*=(50,500,1000), *shrinkage*=(0.001, 0.01), *n.minobsinnode*=(1,5)]. The Bosted  
737 Classification Tree was implemented unusing method *ada* and tuneGrid [*iter*=(100,  
738 1000, 3000), *maxdepth*=(1,5,20), *nu*=(0.01)]. Models were assessed using standard  
739 metrics for data retrieval, with receiver operating and precision-recall curves  
740 generated using package PRROC <sup>98</sup>.

741

742 To saturate the genome in predictions, a total of 15 new training test splits (80:20)  
743 were generated, again maintaining the genome-wide proportion of core and LS  
744 regions in data set. The random forest and stochastic gradient boosting classifiers  
745 were used, based on their highest performance from the initial test. The settings  
746 were picked based on best performance from initial testing: random forest, method  
747 *rf* and tuneGrid [*mtry*=3]; stochastic gradient boosting, method *gbm* and tuneGrid  
748 [*interaction.depth*=(5), *n.trees*=(500), *shrinkage*=(0.01), *n.minobsinnode*=(5)]. The  
749 predictions for each of the 15 runs were assessed using the precision, recall and  
750 MCC metrics. For each genomic region, a consensus designation was assigned based  
751 on the highest occurrence of core versus LS prediction across the 15 trials. This was  
752 done independently between the two models. A region was finally classified as LS or  
753 core based on the majority classification across the 15 trails. For regions that had an  
754 equal number of core and LS predictions, the regions were designated as core to be  
755 conservative. A final high confidence LS consensus designation was determined for  
756 each genomic region if it was predicted LS by both models. Regions predicted LS by  
757 only one of the models were designated core. A conservative joining approach was

758 used so that a single core region would be called LS if it were flanked by two LS  
759 regions. This added 41 genomic regions (410 kb) to the LS genome.

760

#### 761 **DATA ACCESS**

762 The sequencing data for this project are accessible from the National Center for  
763 Biotechnology Information (NCBI) Sequence Read Archive (SRA) under BioProject  
764 PRJN592220.

765

#### 766 **ACKNOWLEDGEMENTS**

767 This work was supported in part by a European Molecular Biology Organization  
768 postdoctoral fellowship (EMBO, ALTF 969-2013) and Human Frontier Science  
769 Program Postdoctoral Fellowship (HFSP, LT000627/2014-L) to DEC. A portion of  
770 the work was also carried out in the Cook lab under USDA-NIFA-PBI grant (2018-  
771 67013-28492). Work in the laboratories of M.F.S and B.P.H.J.T. is supported by the  
772 Research Council Earth and Life Sciences (ALW) of the Netherlands Organization of  
773 Scientific Research (NWO).

774

#### 775 **DISCLOSURE DECLARATION**

776 The authors declare no competing interests.

777

#### 778 **SUPPLEMENTAL MATERIAL**

779 Supplemental Fig S1

780 Supplemental Fig S2

781 Supplemental Fig S3

782 Supplemental Fig S4

783 Supplemental Fig S5

784 Supplemental Fig S6

785 Supplemental Fig S7

786 Supplemental Fig S8

787

788

789 Supplemental Table S1

790 Supplemental Table S2

791 Supplemental Table S3

792 Supplemental Table S4



793 Supplemental Table S5  
794 Supplemental Table S6  
795 Supplemental Table S7  
796 **REFERENCES**

- 797 1. Sexton, T. & Cavalli, G. The role of chromosome domains in shaping the  
798 functional genome. *Cell* **160**, 1049–1059 (2015).
- 799 2. David, K. T., Wilson, A. E. & Halanych, K. M. Sequencing Disparity in the  
800 Genomic Era. *Mol. Biol. Evol.* **36**, 1624–1627 (2019).
- 801 3. Thomma, B. P. H. J. *et al.* Mind the gap; seven reasons to close fragmented  
802 genome assemblies. *Fungal Genet. Biol.* **90**, 24–30 (2016).
- 803 4. Seidl, M. F. & Thomma, B. P. H. J. Sex or no sex: evolutionary adaptation  
804 occurs regardless. *Bioessays* **36**, 335–345 (2014).
- 805 5. Giraud, T., Gladieux, P. & Gavrillets, S. Linking the emergence of fungal plant  
806 diseases with ecological speciation. *Trends in Ecology & Evolution* **25**, 387–  
807 395 (2010).
- 808 6. Jones, J. D. G. & Dangl, J. L. The plant immune system. *Nature* **444**, 323–329  
809 (2006).
- 810 7. Raffaele, S. & Kamoun, S. Genome evolution in filamentous plant pathogens:  
811 why bigger can be better. *Nat. Rev. Microbiol.* **10**, 417–430 (2012).
- 812 8. Möller, M. & Stukenbrock, E. H. Evolution and genome architecture in  
813 fungal plant pathogens. *Nat. Rev. Microbiol.* **484**, 186–771 (2017).
- 814 9. Oliveira-Garcia, E. & Valent, B. How eukaryotic filamentous pathogens  
815 evade plant recognition. *Curr. Opin. Microbiol.* **26**, 92–101 (2015).
- 816 10. Cook, D. E., Mesarich, C. H. & Thomma, B. P. H. J. Understanding plant  
817 immunity as a surveillance system to detect invasion. *Annu Rev Phytopathol*  
818 **53**, 541–563 (2015).
- 819 11. Couto, D. & Zipfel, C. Regulation of pattern recognition receptor signalling  
820 in plants. *Nature Reviews Immunology* **16**, 537–552 (2016).
- 821 12. Liang, X. & Zhou, J.-M. Receptor-Like Cytoplasmic Kinases: Central Players  
822 in Plant Receptor Kinase-Mediated Signaling. *Annu Rev Plant Biol* **69**, 267–  
823 299 (2018).
- 824 13. Klosterman, S. J. *et al.* Comparative genomics yields insights into niche  
825 adaptation of plant vascular wilt pathogens. *PLoS Pathog.* **7**, e1002137  
826 (2011).
- 827 14. de Jonge, R. *et al.* Extensive chromosomal reshuffling drives evolution of  
828 virulence in an asexual pathogen. *Genome Res.* **23**, 1271–1282 (2013).
- 829 15. Faino, L. *et al.* Transposons passively and actively contribute to evolution of  
830 the two-speed genome of a fungal pathogen. *Genome Res.* **26**, 1091–1100  
831 (2016).
- 832 16. Shi-Kunne, X., Faino, L., van den Berg, G. C. M., Thomma, B. P. H. J. & Seidl, M.  
833 F. Evolution within the fungal genus *Verticillium* is characterized by  
834 chromosomal rearrangement and gene loss. *Environ. Microbiol.* **20**, 1362–  
835 1373 (2018).

- 836 17. de Jonge, R. *et al.* Tomato immune receptor Ve1 recognizes effector of  
837 multiple fungal pathogens uncovered by genome and RNA sequencing.  
838 *Proc. Natl. Acad. Sci. U.S.A.* **109**, 5110–5115 (2012).
- 839 18. Kombrink, A. *et al.* *Verticillium dahliae* LysM effectors differentially  
840 contribute to virulence on plant hosts. *Mol. Plant Pathol.* **18**, 596–608  
841 (2017).
- 842 19. Ma, L.-J. *et al.* Comparative genomics reveals mobile pathogenicity  
843 chromosomes in *Fusarium*. *Nature* **464**, 367–373 (2010).
- 844 20. Raffaele, S. *et al.* Genome evolution following host jumps in the Irish potato  
845 famine pathogen lineage. *Science* **330**, 1540–1543 (2010).
- 846 21. Rouxel, T. *et al.* Effector diversification within compartments of the  
847 *Leptosphaeria maculans* genome affected by Repeat-Induced Point  
848 mutations. *Nature Communications* **2**, 202 (2011).
- 849 22. Goodwin, S. B. *et al.* Finished genome of the fungal wheat pathogen  
850 *Mycosphaerella graminicola* reveals dispensome structure, chromosome  
851 plasticity, and stealth pathogenesis. *PLoS Genet.* **7**, e1002070 (2011).
- 852 23. Dutheil, J. Y. *et al.* A Tale of Genome Compartmentalization: The Evolution  
853 of Virulence Clusters in Smut Fungi. *Genome Biol Evol* **8**, 681–704 (2016).
- 854 24. Tsushima, A. *et al.* Genomic Plasticity Mediated by Transposable Elements  
855 in the Plant Pathogenic Fungus *Colletotrichum higginsianum*. *Genome Biol*  
856 *Evol* **11**, 1487–1500 (2019).
- 857 25. Peng, Z. *et al.* Effector gene reshuffling involves dispensable mini-  
858 chromosomes in the wheat blast fungus. *PLoS Genet.* **15**, e1008272 (2019).
- 859 26. Dong, S., Raffaele, S. & Kamoun, S. The two-speed genomes of filamentous  
860 pathogens: waltz with plants. *Current Opinion in Genetics & Development*  
861 **35**, 57–65 (2015).
- 862 27. Macheleidt, J. *et al.* *Regulation and Role of Fungal Secondary Metabolites.*  
863 *Annual Review of Genetics* **50**, 371–392 (2016).
- 864 28. Soyer, J. L. *et al.* Epigenetic Control of Effector Gene Expression in the Plant  
865 Pathogenic Fungus *Leptosphaeria maculans*. *PLoS Genet.* **10**, e1004227  
866 (2014).
- 867 29. Connolly, L. R., Smith, K. M. & Freitag, M. The *Fusarium graminearum*  
868 histone H3 K27 methyltransferase KMT6 regulates development and  
869 expression of secondary metabolite gene clusters. *PLoS Genet.* **9**, e1003916  
870 (2013).
- 871 30. Studt, L. *et al.* Knock-down of the methyltransferase Kmt6 relieves  
872 H3K27me3 and results in induction of cryptic and otherwise silent  
873 secondary metabolite gene clusters in *Fusarium fujikuroi*. *Environ.*  
874 *Microbiol.* **18**, 4037–4054 (2016).
- 875 31. Chujo, T. & Scott, B. Histone H3K9 and H3K27 methylation regulates fungal  
876 alkaloid biosynthesis in a fungal endophyte-plant symbiosis. *Molecular*  
877 *Microbiology* **92**, 413–434 (2014).
- 878 32. Sexton, T. *et al.* Three-dimensional folding and functional organization  
879 principles of the *Drosophila* genome. *Cell* **148**, 458–472 (2012).

- 880 33. Riddle, N. C. *et al.* Plasticity in patterns of histone modifications and  
881 chromosomal proteins in *Drosophila* heterochromatin. *Genome Res.* **21**,  
882 147–163 (2011).
- 883 34. Rea, S. *et al.* Regulation of chromatin structure by site-specific histone H3  
884 methyltransferases. *Nature* **406**, 593–599 (2000).
- 885 35. Cao, R. *et al.* Role of histone H3 lysine 27 methylation in polycomb-group  
886 silencing. *Science* **298**, 1039–1043 (2002).
- 887 36. Margueron, R. & Reinberg, D. The Polycomb complex PRC2 and its mark in  
888 life. *Nature* **469**, 343–349 (2011).
- 889 37. Janssen, A., Colmenares, S. U. & Karpen, G. H. Heterochromatin: Guardian of  
890 the Genome. *Annu. Rev. Cell Dev. Biol.* **34**, 265–288 (2018).
- 891 38. Tamaru, H. & Selker, E. U. A histone H3 methyltransferase controls DNA  
892 methylation in *Neurospora crassa*. *Nature* **414**, 277–283 (2001).
- 893 39. Kouzminova, E. & Selker, E. U. Dim-2 encodes a DNA methyltransferase  
894 responsible for all known cytosine methylation in *Neurospora*. *EMBO J.* **20**,  
895 4309–4323 (2001).
- 896 40. Freitag, M., Hickey, P. C., Khlafallah, T. K., Read, N. D. & Selker, E. U. HP1 Is  
897 Essential for DNA Methylation in *Neurospora*. *Mol. Cell* **13**, 427–434  
898 (2004).
- 899 41. Honda, S. & Selker, E. U. Direct interaction between DNA methyltransferase  
900 DIM-2 and HP1 is required for DNA methylation in *Neurospora crassa*. *Mol.*  
901 *Cell. Biol.* **28**, 6044–6055 (2008).
- 902 42. Freitag, M., Williams, R. L., Kothe, G. O. & Selker, E. U. A cytosine  
903 methyltransferase homologue is essential for repeat-induced point  
904 mutation in *Neurospora crassa*. *Proc. Natl. Acad. Sci. U.S.A.* **99**, 8802–8807  
905 (2002).
- 906 43. Lewis, Z. A. *et al.* Relics of repeat-induced point mutation direct  
907 heterochromatin formation in *Neurospora crassa*. *Genome Res.* **19**, 427–  
908 437 (2009).
- 909 44. Selker, E. U. *et al.* The methylated component of the *Neurospora crassa*  
910 genome. *Nature* **422**, 893–897 (2003).
- 911 45. Ernst, J. *et al.* Mapping and analysis of chromatin state dynamics in nine  
912 human cell types. *Nature* **473**, 43–49 (2011).
- 913 46. Bemer, M. & Grossniklaus, U. Dynamic regulation of Polycomb group  
914 activity during plant development. *Current Opinion in Plant Biology* **15**,  
915 523–529 (2012).
- 916 47. Gaydos, L. J., Wang, W. & Strome, S. Gene repression. H3K27me and PRC2  
917 transmit a memory of repression across generations and during  
918 development. *Science* **345**, 1515–1518 (2014).
- 919 48. Dattani, A. *et al.* Epigenetic analyses of planarian stem cells demonstrate  
920 conservation of bivalent histone modifications in animal stem cells. *Genome*  
921 *Res.* **28**, 1543–1554 (2018).
- 922 49. Freitag, M. Histone Methylation by SET Domain Proteins in Fungi. *Annu.*  
923 *Rev. Microbiol.* **71**, 413–439 (2017).

- 924 50. Seidl, M. F., Cook, D. E. & Thomma, B. P. H. J. Chromatin Biology Impacts  
925 Adaptive Evolution of Filamentous Plant Pathogens. *PLoS Pathog.* **12**,  
926 e1005920 (2016).
- 927 51. Galazka, J. M. *et al.* Neurospora chromosomes are organized by blocs of  
928 importin alpha-dependent heterochromatin that are largely independent of  
929 H3K9me3. *Genome Res.* **26**, gr.203182.115–1080 (2016).
- 930 52. Klocko, A. D. *et al.* Normal chromosome conformation depends on  
931 subtelomeric facultative heterochromatin in *Neurospora crassa*. *Proc. Natl.*  
932 *Acad. Sci. U.S.A.* **113**, 15048–15053 (2016).
- 933 53. Möller, M. *et al.* Destabilization of chromosome structure by histone H3  
934 lysine 27 methylation. *PLoS Genet.* **15**, e1008093 (2019).
- 935 54. Chen, H. *et al.* Phytophthora methylomes are modulated by 6mA  
936 methyltransferases and associated with adaptive genome regions. *Genome*  
937 *Biol.* **19**, 181–16 (2018).
- 938 55. Clark, S. J., Harrison, J., Paul, C. L. & Frommer, M. High sensitivity mapping  
939 of methylated cytosines. *Nucleic Acids Res.* **22**, 2990–2997 (1994).
- 940 56. Lister, R. & Ecker, J. R. Finding the fifth base: Genome-wide sequencing of  
941 cytosine methylation. *Genome Res.* **19**, 959–966 (2009).
- 942 57. Montanini, B. *et al.* Non-exhaustive DNA methylation-mediated transposon  
943 silencing in the black truffle genome, a complex fungal genome with  
944 massive repeat element content. *Genome Biol.* **15**, 411–16 (2014).
- 945 58. Buenrostro, J. D., Giresi, P. G., Zaba, L. C., Chang, H. Y. & Greenleaf, W. J.  
946 Transposition of native chromatin for fast and sensitive epigenomic  
947 profiling of open chromatin, DNA-binding proteins and nucleosome  
948 position. *Nat. Methods* **10**, 1213–1218 (2013).
- 949 59. Bradley, A. P. The use of the area under the ROC curve in the evaluation of  
950 machine learning algorithms. *Pattern Recognition* **30**, 1145–1159 (1997).
- 951 60. Davis, J. & Goadrich, M. The relationship between precision-recall and ROC  
952 curves. in **148**, 233–240 (ACM Press, 2006).
- 953 61. Saito, T. & Rehmsmeier, M. The precision-recall plot is more informative  
954 than the ROC plot when evaluating binary classifiers on imbalanced  
955 datasets. *PLoS ONE* **10**, e0118432 (2015).
- 956 62. Mondo, S. J. *et al.* Widespread adenine N6-methylation of active genes in  
957 fungi. *Nature Genetics* **49**, 964–968 (2017).
- 958 63. Bannister, A. J. *et al.* Selective recognition of methylated lysine 9 on histone  
959 H3 by the HP1 chromo domain. *Nature* **410**, 120–124 (2001).
- 960 64. Cam, H. P. *et al.* Comprehensive analysis of heterochromatin- and RNAi-  
961 mediated epigenetic control of the fission yeast genome. *Nature Genetics*  
962 **37**, 809–819 (2005).
- 963 65. Huisinga, K. L., Brower-Toland, B. & Elgin, S. C. R. The contradictory  
964 definitions of heterochromatin: transcription and silencing. *Chromosoma*  
965 **115**, 110–122 (2006).
- 966 66. Möller, M., Habig, M., Freitag, M. & Stukenbrock, E. H. Extraordinary  
967 Genome Instability and Widespread Chromosome Rearrangements During  
968 Vegetative Growth. *Genetics* **210**, 517–529 (2018).

- 969 67. Schotanus, K. *et al.* Histone modifications rather than the novel regional  
970 centromeres of *Zyoseptoria tritici* distinguish core and accessory  
971 chromosomes. *Epigenetics Chromatin* **8**, 41 (2015).
- 972 68. Faino, L. *et al.* Single-Molecule Real-Time Sequencing Combined with  
973 Optical Mapping Yields Completely Finished Fungal Genome. *mBio* **6**,  
974 e00936–15 (2015).
- 975 69. Santhanam, P. in *Plant Fungal Pathogens: Methods and Protocols* (eds.  
976 Bolton, M. D. & Thomma, B. P. H. J.) 509–517 (Humana Press, 2012).
- 977 70. Frandsen, R. J. N., Andersson, J. A., Kristensen, M. B. & Giese, H. Efficient four  
978 fragment cloning for the construction of vectors for targeted gene  
979 replacement in filamentous fungi. *BMC Mol Biol* **9**, 70–70 (2008).
- 980 71. Xi, Y. & Li, W. BSMAP: Whole genome bisulfite sequence MAPping program.  
981 *BMC Bioinformatics* **10**, 232–9 (2009).
- 982 72. Schultz, M. D., Schmitz, R. J. & Ecker, J. R. ‘Leveling’ the playing field for  
983 analyses of single-base resolution DNA methylomes. *Trends in Genetics* **28**,  
984 583–585 (2012).
- 985 73. Team, R. C. R: A Language and Environment for Statistical Computing.  
986 (2019). Available at: <https://www.R-project.org/>
- 987 74. Le, S., Josse, J. & Husson, F. FactoMineR: An RPackage for Multivariate  
988 Analysis. *J. Stat. Soft.* **25**, 1–18 (2008).
- 989 75. Kassambara, A. & Mundt, F. factoextra: Extract and Visualize the Results of  
990 Multivariate Data Analyses. (2017). Available at: [https://CRAN.R-](https://CRAN.R-project.org/package=factoextra)  
991 [project.org/package=factoextra](https://CRAN.R-project.org/package=factoextra). (Accessed: 13 November 2019)
- 992 76. Ellinghaus, D., Kurtz, S. & Willhoeft, U. LTRharvest, an efficient and flexible  
993 software for de novo detection of LTR retrotransposons. *BMC*  
994 *Bioinformatics* **9**, 18–14 (2008).
- 995 77. Steinbiss, S., Willhoeft, U., Gremme, G. & Kurtz, S. Fine-grained annotation  
996 and classification of de novo predicted LTR retrotransposons. *Nucleic Acids*  
997 *Res.* **37**, 7002–7013 (2009).
- 998 78. Smit, A. & Hubley, R. RepeatModeler Open-1.0. (2015). Available at:  
999 <http://www.repeatmasker.org>. (Accessed: 13 November 2019)
- 1000 79. Campbell, M. S. *et al.* MAKER-P: A Tool kit for the rapid creation,  
1001 management, and quality control of plant genome annotations. *Plant*  
1002 *Physiol.* **164**, 513–524 (2014).
- 1003 80. Rognes, T., Flouri, T., Nichols, B., Quince, C. & Mahé, F. VSEARCH: A versatile  
1004 open source tool for metagenomics. *PeerJ*, e2584 (2016).
- 1005 81. Katoh, K. & Standley, D. M. MAFFT multiple sequence alignment software  
1006 version 7: Improvements in performance and usability. *Mol. Biol. Evol.* **30**,  
1007 772–780 (2013).
- 1008 82. Wicker, T. *et al.* A unified classification system for eukaryotic transposable  
1009 elements. *Nature Reviews Genetics* **8**, 973–982 (2007).
- 1010 83. Hoede, C. *et al.* PASTEC: An automatic transposable element classification  
1011 tool. *PLoS ONE* **9**, e91929 (2014).
- 1012 84. Flutre, T., Duprat, E., Feuillet, C. & Quesneville, H. Considering transposable  
1013 element diversification in de novo annotation approaches. *PLoS ONE* **6**,  
1014 e16526 (2011).

- 1015 85. Amyotte, S. G. *et al.* Transposable elements in phytopathogenic *Verticillium*  
1016 spp.: insights into genome evolution and inter- and intra-specific  
1017 diversification. *BMC Genomics* **13**, 314–20 (2012).
- 1018 86. Bailly-Bechet, M., Haudry, A. & Lerat, E. ‘One code to find them all’: a perl  
1019 tool to conveniently parse RepeatMasker output files. *Mobile DNA* **5**, 13  
1020 (2014).
- 1021 87. Rice, P., Longden, I. & Bleasby, A. EMBOSS: the European Molecular Biology  
1022 Open Software Suite. *Trends Genet.* **16**, 276–277 (2000).
- 1023 88. Jukes, T. H. & Cantor, C. *Evolution of protein molecules. Mammalian Protein*  
1024 *Metabolism* **3**, 21–132. New York, Academic Press (1969)
- 1025 89. Van De Peer, Y., Neefs, J.-M. & De Wachter, R. Small ribosomal subunit RNA  
1026 sequences, evolutionary relationships among different life forms, and  
1027 mitochondrial origins. *Journal of Molecular Evolution* **30**, 463–476 (1990).
- 1028 90. Dobin, A. *et al.* STAR: ultrafast universal RNA-seq aligner. *Bioinformatics*  
1029 **29**, 15–21 (2013).
- 1030 91. Love, M. I., Huber, W. & Anders, S. Moderated estimation of fold change and  
1031 dispersion for RNA-seq data with DESeq2. *Genome Biol.* **15**, 550 (2014).
- 1032 92. Li, H. Aligning sequence reads, clone sequences and assembly contigs with  
1033 BWA-MEM. *arXiv* (2013).
- 1034 93. Amemiya, H. M., Kundaje, A. & Boyle, A. P. The ENCODE Blacklist:  
1035 Identification of Problematic Regions of the Genome. *Sci Rep* **9**, 9354  
1036 (2019).
- 1037 94. Buenrostro, J. D., Wu, B., Chang, H. Y. & Greenleaf, W. J. *ATAC-seq: A Method*  
1038 *for Assaying Chromatin Accessibility Genome-Wide*. 21.29.1–21.29.9 (John  
1039 Wiley & Sons, Inc., 2015). doi:10.1002/0471142727.mb2129s109
- 1040 95. Picard Toolkit. *broadinstitute/picard* (2018). Available at:  
1041 <http://broadinstitute.github.io/picard/>. (Accessed: 22nd November 2019)
- 1042 96. Quinlan, A. R. & Hall, I. M. BEDTools: a flexible suite of utilities for  
1043 comparing genomic features. *Bioinformatics* **26**, 841–842 (2010).
- 1044 97. Kuhn, M. Building predictive models in R using the caret package. *J. Stat.*  
1045 *Soft.* **28**, 1–26 (2008).
- 1046 98. Grau, J., Grosse, I. & Keilwagen, J. PRROC: computing and visualizing  
1047 precision-recall and receiver operating characteristic curves in R.  
1048 *Bioinformatics* **31**, 2595–2597 (2015).
- 1049
